# Supplementary material for: List randomization for eliciting HIV status and sexual behaviors in rural KwaZulu-Natal, South Africa: a randomized experiment using known true values for validation
Source: PubMed Central journal article supplement (PMC5968464; doi:10.1186/s12874-018-0507-9), 2018-05-25
Supplement: 12874_2018_507_MOESM1_ESM.pdf [file 12874_2018_507_MOESM1_ESM.pdf]

Appendix 1: Questionnaire results summary

|                                                         | <i>a priori</i><br>estimated<br>%<br>affirmative | Arm B<br>survey<br>estimated<br>%<br>affirmative | # (%)<br>refusals |
|---------------------------------------------------------|--------------------------------------------------|--------------------------------------------------|-------------------|
| <i>Block 1 (training question)</i>                      |                                                  |                                                  |                   |
| I am currently wearing socks.                           | 50%                                              | 15%                                              | 1 (0%)            |
| I have blue hair.                                       | 0%                                               | 0%                                               | 1 (0%)            |
| I went swimming at least once in the last 7 days.       | 20%                                              | 1%                                               | 1 (0%)            |
| I ate beans yesterday.                                  | 20%                                              | 22%                                              | 1 (0%)            |
| <b>I brushed my teeth today.</b>                        | 70%                                              | 78%                                              | 0 (0%)            |
| Non-sensitive question sum                              | 0.90                                             | 0.38                                             | 1 (0%)            |
| LR count sum                                            | 1.60                                             | 1.04                                             | 0 (0%)            |
| <i>Block 2</i>                                          |                                                  |                                                  |                   |
| I wore a red shirt at least once in the past 7 days.    | 40%                                              | 10%                                              | 1 (0%)            |
| I prefer rice over pap.                                 | 40%                                              | 31%                                              | 0 (0%)            |
| I played football yesterday.                            | 20%                                              | 3%                                               | 1 (0%)            |
| I prefer bananas over grapes.                           | 50%                                              | 62%                                              | 0 (0%)            |
| <b>I used a condom during my last sexual encounter.</b> | 20%                                              | 54%                                              | 5 (2%)            |
| Non-sensitive question sum                              | 1.50                                             | 1.06                                             | 1 (0%)            |
| LR count sum                                            | 1.70                                             | 1.65                                             | 1 (0%)            |
| <i>Block 3</i>                                          |                                                  |                                                  |                   |
| I am right-handed.                                      | 90%                                              | 92%                                              | 1 (0%)            |
| I have a blue pair of shoes.                            | 20%                                              | 6%                                               | 1 (0%)            |
| It rained yesterday.                                    | 5%                                               | 45%                                              | 1 (0%)            |
| I ate amasi yesterday.                                  | 20%                                              | 10%                                              | 1 (0%)            |
| <b>I am HIV negative.</b>                               | 30%                                              | 53%                                              | 6 (3%)            |
| Sum non-sensitive questions                             | 1.35                                             | 1.53                                             | 2 (1%)            |
| List randomization count                                | 1.65                                             | 2.10                                             | 4 (2%)            |
| <i>Block 4</i>                                          |                                                  |                                                  |                   |
| I have two arms.                                        | 99%                                              | 98%                                              | 0 (0%)            |
| I prefer Maskandi over Isicathamiya music.              | 50%                                              | 73%                                              | 1 (0%)            |
| I prefer aubergine over beet root.                      | 50%                                              | 12%                                              | 0 (0%)            |
| I wore a blue shirt at least once in the past 7 days.   | 20%                                              | 11%                                              | 0 (0%)            |
| <b>I have had anal sex within the last 12 months.</b>   | 5%                                               | 2%                                               | 3 (1%)            |
| Sum non-sensitive questions                             | 2.24                                             | 1.94                                             | 1 (0%)            |
| List randomization count                                | 2.24                                             | 2.07                                             | 2 (1%)            |
| <i>Block 5</i>                                          |                                                  |                                                  |                   |
| I drank coffee today.                                   | 20%                                              | 9%                                               | 0 (0%)            |
| My favorite color is blue.                              | 60%                                              | 31%                                              | 1 (0%)            |
| I prefer yam over sweet potato.                         | 60%                                              | 53%                                              | 1 (0%)            |
| Today is a Thursday.                                    | 20%                                              | 19%                                              | 1 (0%)            |
| <b>I refused the AHRI DSS HIV test this year.</b>       | 70%                                              | 13%                                              | 0 (0%)            |
| Sum non-sensitive questions                             | 1.40                                             | 1.11                                             | 2 (1%)            |
| List randomization count                                | 2.10                                             | 1.66                                             | 1 (0%)            |

## Appendix 2: Estimates by demographic group

| Population                                                         | Estimates           |                         |                              | Sample sizes                                   |                   |                        |
|--------------------------------------------------------------------|---------------------|-------------------------|------------------------------|------------------------------------------------|-------------------|------------------------|
|                                                                    | LR<br>estimate (CI) | Direct<br>estimate (CI) | Known truth<br>estimate (CI) | LR<br>total n (list block<br>arm + direct arm) | Direct<br>total n | Known truth<br>total n |
| <i>Panel a: "I brushed my teeth today."</i>                        |                     |                         |                              |                                                |                   |                        |
| All                                                                | 66% (54:78%)        | 78% (72:83%)            |                              | 482 (262+220)                                  | 221               |                        |
| Female                                                             | 71% (56:85%)        | 82% (75:88%)            |                              | 308 (172+136)                                  | 137               |                        |
| Male                                                               | 57% (37:77%)        | 71% (62:81%)            |                              | 174 (90+84)                                    | 84                |                        |
| Age 18-24                                                          | 49% (28:71%)        | 74% (59:88%)            |                              | 88 (51+37)                                     | 38                |                        |
| Age 25-39                                                          | 60% (41:80%)        | 82% (74:90%)            |                              | 174 (91+83)                                    | 83                |                        |
| Age 40-64                                                          | 78% (57:98%)        | 78% (69:87%)            |                              | 185 (100+85)                                   | 85                |                        |
| Age 65+                                                            | 77% (22:131%)       | 67% (42:91%)            |                              | 35 (20+15)                                     | 15                |                        |
| <i>Panel b: "I used a condom during my last sexual encounter."</i> |                     |                         |                              |                                                |                   |                        |
| All                                                                | 59% (43:75%)        | 54% (48:61%)            |                              | 481 (261+220)                                  | 216               |                        |
| Female                                                             | 65% (46:85%)        | 51% (42:59%)            |                              | 307 (171+136)                                  | 136               |                        |
| Male                                                               | 47% (20:75%)        | 60% (49:71%)            |                              | 174 (90+84)                                    | 80                |                        |
| Age 18-24                                                          | 58% (20:95%)        | 69% (53:84%)            |                              | 88 (51+37)                                     | 35                |                        |
| Age 25-39                                                          | 73% (45:101%)       | 63% (53:74%)            |                              | 173 (90+83)                                    | 82                |                        |
| Age 40-64                                                          | 61% (37:86%)        | 48% (37:58%)            |                              | 185 (100+85)                                   | 84                |                        |
| Age 65+                                                            | -17% (-68:34%)      | 7% (-6:20%)             |                              | 35 (20+15)                                     | 15                |                        |
| <i>Panel c: "I am HIV negative."</i>                               |                     |                         |                              |                                                |                   |                        |
| All                                                                | 57% (42:71%)        | 53% (47:60%)            | 26% (22:30%)                 | 477 (258+219)                                  | 215               | 412                    |
| Female                                                             | 55% (37:74%)        | 48% (39:56%)            | 26% (21:31%)                 | 304 (169+135)                                  | 134               | 269                    |
| Male                                                               | 58% (33:83%)        | 63% (52:74%)            | 25% (18:32%)                 | 173 (89+84)                                    | 81                | 143                    |
| Age 18-24                                                          | 58% (25:91%)        | 86% (75:98%)            | 47% (36:59%)                 | 88 (51+37)                                     | 36                | 72                     |
| Age 25-39                                                          | 45% (18:71%)        | 53% (42:64%)            | 17% (11:23%)                 | 171 (88+83)                                    | 81                | 147                    |
| Age 40-64                                                          | 66% (42:89%)        | 36% (26:47%)            | 17% (11:23%)                 | 184 (100+84)                                   | 83                | 164                    |
| Age 65+                                                            | 65% (14:117%)       | 73% (50:96%)            | 66% (48:83%)                 | 34 (19+15)                                     | 15                | 29                     |
| <i>Panel d: "I have had anal sex within the last 12 months."</i>   |                     |                         |                              |                                                |                   |                        |
| All                                                                | 13% (0:27%)         | 2% (0:4%)               |                              | 480 (260+220)                                  | 218               |                        |
| Female                                                             | 15% (-2:32%)        | 1% (-1:2%)              |                              | 307 (170+137)                                  | 136               |                        |
| Male                                                               | 11% (-10:33%)       | 4% (0:8%)               |                              | 173 (90+83)                                    | 82                |                        |
| Age 18-24                                                          | 20% (-15:54%)       | 0% (0:0%)               |                              | 88 (51+37)                                     | 36                |                        |
| Age 25-39                                                          | 10% (-12:32%)       | 4% (0:8%)               |                              | 173 (90+83)                                    | 82                |                        |
| Age 40-64                                                          | 11% (-10:32%)       | 1% (-1:3%)              |                              | 185 (100+85)                                   | 85                |                        |
| Age 65+                                                            | 23% (-34:80%)       | 0% (0:0%)               |                              | 34 (19+15)                                     | 15                |                        |
| <i>Panel e: "I refused the AHRI DSS HIV test this year."</i>       |                     |                         |                              |                                                |                   |                        |
| All                                                                | 55% (37:72%)        | 13% (8:17%)             | 15% (12:18%)                 | 480 (261+219)                                  | 221               | 483                    |
| Female                                                             | 58% (36:79%)        | 15% (9:21%)             | 13% (9:17%)                  | 307 (171+136)                                  | 137               | 309                    |
| Male                                                               | 51% (20:81%)        | 10% (3:16%)             | 18% (12:24%)                 | 173 (90+83)                                    | 84                | 174                    |
| Age 18-24                                                          | 37% (-5:79%)        | 8% (-1:17%)             | 19% (11:27%)                 | 88 (51+37)                                     | 38                | 89                     |
| Age 25-39                                                          | 45% (15:75%)        | 16% (8:24%)             | 16% (10:21%)                 | 172 (90+82)                                    | 83                | 174                    |
| Age 40-64                                                          | 71% (42:99%)        | 9% (3:16%)              | 11% (7:16%)                  | 185 (100+85)                                   | 85                | 185                    |
| Age 65+                                                            | 75% (18:132%)       | 27% (4:50%)             | 17% (5:30%)                  | 35 (20+15)                                     | 15                | 35                     |

Appendix 3: Multivariate regression results for questions with no known truth

|                                                                                               | I brushed my teeth today. |                  |                 | I used a condom during my last sexual encounter. |                  |                 | I have had anal sex within the last 12 months. |                  |                  |
|-----------------------------------------------------------------------------------------------|---------------------------|------------------|-----------------|--------------------------------------------------|------------------|-----------------|------------------------------------------------|------------------|------------------|
| Covariate:                                                                                    | (1)                       | (2)              | (3)             | (4)                                              | (5)              | (6)             | (7)                                            | (8)              | (9)              |
| Intercept                                                                                     | 0.66**<br>(0.06)          | 0.67**<br>(0.08) | -0.24<br>(0.54) | 0.59**<br>(0.08)                                 | 0.67**<br>(0.11) | 0.65<br>(0.71)  | 0.13*<br>(0.07)                                | 0.18**<br>(0.09) | 1.43**<br>(0.61) |
| HIV negative                                                                                  |                           | 0.00<br>(0.15)   | 0.08<br>(0.16)  |                                                  | -0.23<br>(0.19)  | -0.07<br>(0.22) |                                                | -0.09<br>(0.18)  | -0.19<br>(0.20)  |
| HIV unknown (refused)                                                                         |                           | -0.11<br>(0.17)  | -0.11<br>(0.18) |                                                  | -0.29<br>(0.23)  | -0.16<br>(0.25) |                                                | -0.26<br>(0.18)  | -0.21<br>(0.20)  |
| Male                                                                                          |                           |                  | -0.18<br>(0.13) |                                                  |                  | -0.13<br>(0.17) |                                                |                  | 0.00<br>(0.14)   |
| Age                                                                                           |                           |                  | 0.04<br>(0.02)  |                                                  |                  | 0.01<br>(0.03)  |                                                |                  | -0.05<br>(0.02)  |
| Age <sup>2</sup>                                                                              |                           |                  | 0.00<br>(0.00)  |                                                  |                  | 0.00<br>(0.00)  |                                                |                  | 0.00**<br>(0.00) |
| Years of education                                                                            |                           |                  | 0.01<br>(0.02)  |                                                  |                  | 0.00<br>(0.03)  |                                                |                  | -0.03<br>(0.02)  |
| coefficient (SE). * p<.10, ** p<.05. Correlation with non-sensitive item component not shown. |                           |                  |                 |                                                  |                  |                 |                                                |                  |                  |
| Residual SE                                                                                   | 0.68                      | 0.68             | 0.66            | 0.90                                             | 0.90             | 0.88            | 0.76                                           | 0.76             | 0.76             |
| Observations                                                                                  |                           |                  |                 |                                                  |                  |                 |                                                |                  |                  |
| <i>List block arm</i>                                                                         | 262                       | 262              | 246             | 261                                              | 261              | 245             | 260                                            | 260              | 245              |
| <i>Direct arm</i>                                                                             | 220                       | 220              | 211             | 220                                              | 220              | 211             | 220                                            | 220              | 211              |
| <i>Total</i>                                                                                  | 482                       | 482              | 457             | 481                                              | 481              | 456             | 480                                            | 480              | 456              |

Appendix 4: Time to completion of each survey section

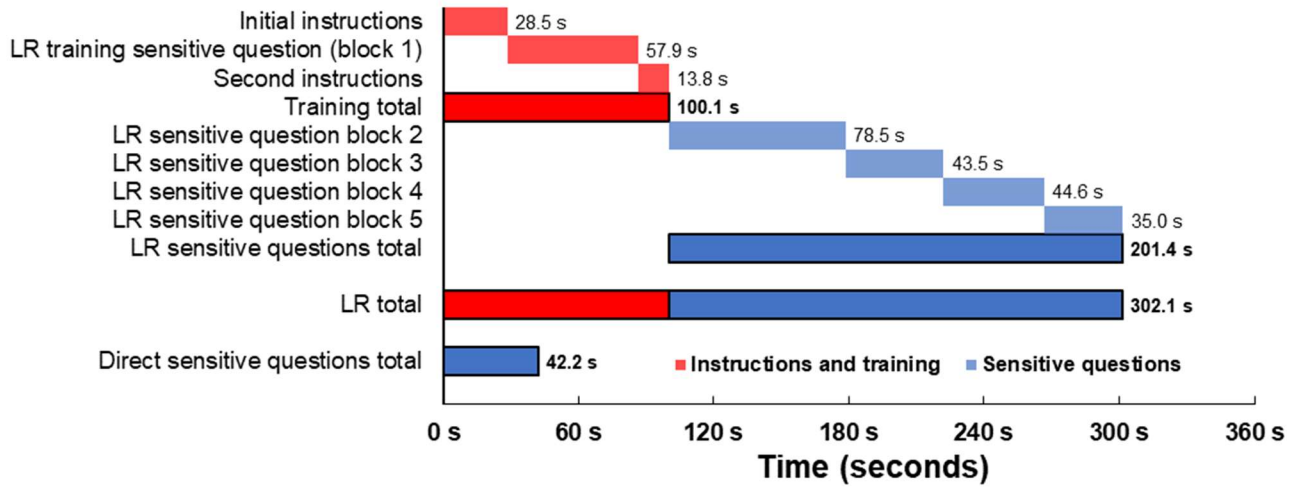

Appendix 5: LR estimate by position of sensitive questions within block

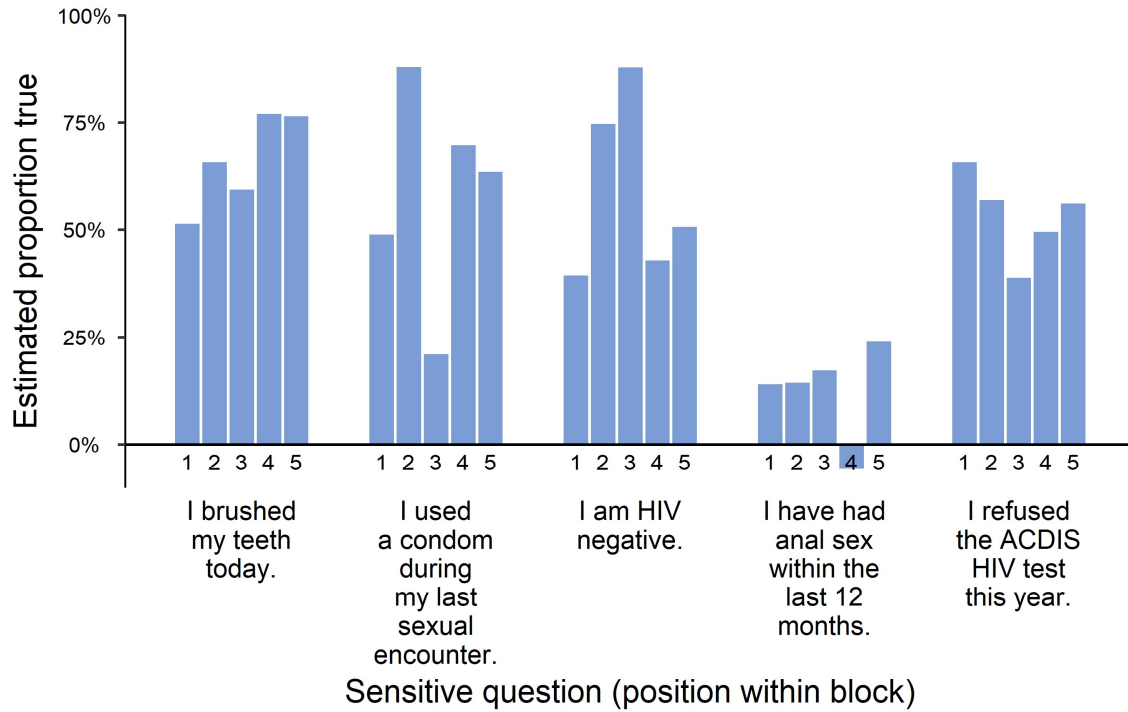

Each bar represented the percentage of sums which are equal to 0, where each sum is the sum of the four non-sensitive question “true” (affirmative) answers associated with a given sensitive question item block.
