# Supplementary material for: List randomization for eliciting HIV status and sexual behaviors in rural KwaZulu-Natal, South Africa: a randomized experiment using known true values for validation
Source: BMC Med Res Methodol. 2018 May 25;18:46. doi: 10.1186/s12874-018-0507-9 (PMC5968464; doi:10.1186/s12874-018-0507-9)
Supplement: Supplementary file 2 — Full dataset for analysis, formatted as a CSV file. This file contains the main collected data from the study, with all identifying and demographic information removed. Additional data and alternative formats may be available upon request, pending review of ethics agreements. (CSV 103 kb) [file 12874_2018_507_MOESM2_ESM.csv]

HIVResult	InARTemis	lr_indicator	lr_a_variant	lr_b_variant	lr_c_variant	lr_d_variant	lr_e_variant	direct_indicator	question_a_lr_sum	question_b_lr_sum	question_c_lr_sum	question_d_lr_sum	question_e_lr_sum	question_a_direct	question_b_direct	question_c_direct	question_d_direct	question_e_direct	question_a_direct_nonsens_sum	question_b_direct_nonsens_sum	question_c_direct_nonsens_sum	question_d_direct_nonsens_sum	question_e_direct_nonsens_sum	question_a_sum_both	question_b_sum_both	question_c_sum_both	question_d_sum_both	question_e_sum_both	dr_nonsens_1	dr_nonsens_2	dr_nonsens_3	dr_nonsens_4	dr_nonsens_5	dr_nonsens_6	dr_nonsens_7	dr_nonsens_8	dr_nonsens_9	dr_nonsens_10	dr_nonsens_11	dr_nonsens_12	dr_nonsens_13	dr_nonsens_14	dr_nonsens_15	dr_nonsens_16	dr_nonsens_17	dr_nonsens_18	dr_nonsens_19	dr_nonsens_20	position_sens_a
Positive	No	1	23415	23451	21345	23451	23415	0	1	3	2	3	2	NA	NA	NA	NA	NA	NA	NA	NA	NA	NA	1	3	2	3	2	NA	NA	NA	NA	NA	NA	NA	NA	NA	NA	NA	NA	NA	NA	NA	NA	NA	NA	NA	NA	4
Positive	Yes	0	12345	23415	23451	23451	21345	1	NA	NA	NA	NA	NA	1	0	0	0	0	1	2	1	2	3	1	2	1	2	3	0	0	0	1	1	0	0	1	1	0	0	0	1	0	0	1	0	1	1	1	1
Positive	No	0	23415	23145	23415	21345	12345	1	NA	NA	NA	NA	NA	1	0	1	0	0	0	0	3	1	1	0	0	3	1	1	0	0	0	0	0	0	0	0	1	1	1	0	1	0	0	0	0	0	1	0	4
Unknown	No	1	23145	21345	21345	23145	12345	0	0	2	1	1	2	NA	NA	NA	NA	NA	NA	NA	NA	NA	NA	0	2	1	1	2	NA	NA	NA	NA	NA	NA	NA	NA	NA	NA	NA	NA	NA	NA	NA	NA	NA	NA	NA	NA	3
Unknown	No	1	23451	12345	23451	21345	23145	0	0	1	2	2	0	NA	NA	NA	NA	NA	NA	NA	NA	NA	NA	0	1	2	2	0	NA	NA	NA	NA	NA	NA	NA	NA	NA	NA	NA	NA	NA	NA	NA	NA	NA	NA	NA	NA	5
Positive	Yes	0	12345	21345	21345	21345	12345	1	NA	NA	NA	NA	NA	1	1	0	0	1	0	0	1	1	1	0	0	1	1	1	0	0	0	0	0	0	0	0	1	0	0	0	1	0	0	0	0	0	1	0	1
Unknown	No	1	23451	12345	12345	23451	23145	0	2	0	1	1	1	NA	NA	NA	NA	NA	NA	NA	NA	NA	NA	2	0	1	1	1	NA	NA	NA	NA	NA	NA	NA	NA	NA	NA	NA	NA	NA	NA	NA	NA	NA	NA	NA	NA	5
Positive	Yes	0	12345	23145	23145	12345	23145	1	NA	NA	NA	NA	NA	1	1	1	0	0	0	2	0	1	1	0	2	0	1	1	0	0	0	0	0	0	1	1	0	0	0	0	0	1	0	0	0	0	1	0	1
Negative	No	0	23415	23145	23415	23451	23415	1	NA	NA	NA	NA	NA	0	0	1	0	0	0	2	2	3	2	0	2	2	3	2	0	0	0	0	0	1	0	1	1	0	1	0	1	1	0	1	0	1	1	0	4
Positive	No	0	14253	14523	43251	23415	54321	1	NA	NA	NA	NA	NA	1	0	0	0	0	1	0	1	2	3	1	0	1	2	3	0	0	0	1	0	0	0	0	1	0	0	0	1	1	0	0	0	1	1	1	1
Positive	No	1	31425	43215	32415	14352	24351	0	4	3	2	4	2	NA	NA	NA	NA	NA	NA	NA	NA	NA	NA	4	3	2	4	2	NA	NA	NA	NA	NA	NA	NA	NA	NA	NA	NA	NA	NA	NA	NA	NA	NA	NA	NA	NA	2
Unknown	No	1	14352	43512	45123	42531	34125	0	2	2	3	2	1	NA	NA	NA	NA	NA	NA	NA	NA	NA	NA	2	2	3	2	1	NA	NA	NA	NA	NA	NA	NA	NA	NA	NA	NA	NA	NA	NA	NA	NA	NA	NA	NA	NA	1
Positive	Yes	1	21345	23451	23415	12345	23145	0	1	3	2	1	1	NA	NA	NA	NA	NA	NA	NA	NA	NA	NA	1	3	2	1	1	NA	NA	NA	NA	NA	NA	NA	NA	NA	NA	NA	NA	NA	NA	NA	NA	NA	NA	NA	NA	2
Negative	No	1	12345	23145	23451	23145	23145	0	0	1	3	NA	1	NA	NA	NA	NA	NA	NA	NA	NA	NA	NA	0	1	3	NA	1	NA	NA	NA	NA	NA	NA	NA	NA	NA	NA	NA	NA	NA	NA	NA	NA	NA	NA	NA	NA	1
Positive	No	1	23451	23451	23451	23451	21345	0	0	0	3	3	1	NA	NA	NA	NA	NA	NA	NA	NA	NA	NA	0	0	3	3	1	NA	NA	NA	NA	NA	NA	NA	NA	NA	NA	NA	NA	NA	NA	NA	NA	NA	NA	NA	NA	5
Negative	No	0	34215	51432	15324	45312	41523	1	NA	NA	NA	NA	NA	1	0	1	0	0	0	2	1	3	0	0	2	1	3	0	0	0	0	0	0	1	0	1	0	0	1	0	1	1	0	1	0	0	0	0	4
Positive	No	1	21453	54123	15324	14523	34125	0	1	3	2	4	2	NA	NA	NA	NA	NA	NA	NA	NA	NA	NA	1	3	2	4	2	NA	NA	NA	NA	NA	NA	NA	NA	NA	NA	NA	NA	NA	NA	NA	NA	NA	NA	NA	NA	2
Positive	Yes	1	23145	23451	23415	23415	12345	0	3	0	3	1	3	NA	NA	NA	NA	NA	NA	NA	NA	NA	NA	3	0	3	1	3	NA	NA	NA	NA	NA	NA	NA	NA	NA	NA	NA	NA	NA	NA	NA	NA	NA	NA	NA	NA	3
Positive	Yes	1	23415	21345	21345	23145	23451	0	1	2	2	3	4	NA	NA	NA	NA	NA	NA	NA	NA	NA	NA	1	2	2	3	4	NA	NA	NA	NA	NA	NA	NA	NA	NA	NA	NA	NA	NA	NA	NA	NA	NA	NA	NA	NA	4
Positive	Yes	1	12435	35124	54312	31425	25431	0	1	1	2	3	2	NA	NA	NA	NA	NA	NA	NA	NA	NA	NA	1	1	2	3	2	NA	NA	NA	NA	NA	NA	NA	NA	NA	NA	NA	NA	NA	NA	NA	NA	NA	NA	NA	NA	1
Positive	No	1	21543	21345	14532	51234	23451	0	1	1	3	3	1	NA	NA	NA	NA	NA	NA	NA	NA	NA	NA	1	1	3	3	1	NA	NA	NA	NA	NA	NA	NA	NA	NA	NA	NA	NA	NA	NA	NA	NA	NA	NA	NA	NA	2
Positive	Yes	1	21345	23451	23451	23451	23415	0	2	2	2	2	2	NA	NA	NA	NA	NA	NA	NA	NA	NA	NA	2	2	2	2	2	NA	NA	NA	NA	NA	NA	NA	NA	NA	NA	NA	NA	NA	NA	NA	NA	NA	NA	NA	NA	2
Positive	Yes	0	31245	24135	53124	54321	54213	1	NA	NA	NA	NA	NA	0	1	0	0	0	0	1	1	3	1	0	1	1	3	1	0	0	0	0	0	1	0	0	1	0	0	0	1	1	1	0	0	0	1	0	2
Positive	No	1	21345	23145	23451	23415	21345	0	0	3	1	2	2	NA	NA	NA	NA	NA	NA	NA	NA	NA	NA	0	3	1	2	2	NA	NA	NA	NA	NA	NA	NA	NA	NA	NA	NA	NA	NA	NA	NA	NA	NA	NA	NA	NA	2
Negative	No	1	23415	23415	23145	23145	21345	0	0	NA	NA	NA	NA	NA	NA	NA	NA	NA	NA	NA	NA	NA	NA	0	NA	NA	NA	NA	NA	NA	NA	NA	NA	NA	NA	NA	NA	NA	NA	NA	NA	NA	NA	NA	NA	NA	NA	NA	4
Negative	No	1	43251	42135	25431	32154	13425	0	1	2	3	3	4	NA	NA	NA	NA	NA	NA	NA	NA	NA	NA	1	2	3	3	4	NA	NA	NA	NA	NA	NA	NA	NA	NA	NA	NA	NA	NA	NA	NA	NA	NA	NA	NA	NA	5
Negative	No	0	24351	31425	53214	15234	43125	1	NA	NA	NA	NA	NA	1	1	1	0	0	0	1	1	2	1	0	1	1	2	1	0	0	0	0	1	0	0	0	0	0	1	0	1	1	0	0	0	1	0	0	5
Positive	No	0	21345	23145	23145	23451	23415	1	NA	NA	NA	NA	NA	1	1	0	0	0	0	1	1	2	1	0	1	1	2	1	0	0	0	0	0	0	0	1	1	0	0	0	1	1	0	0	0	0	0	1	2
Negative	No	1	23451	53214	41235	42531	23415	0	1	0	2	2	3	NA	NA	NA	NA	NA	NA	NA	NA	NA	NA	1	0	2	2	3	NA	NA	NA	NA	NA	NA	NA	NA	NA	NA	NA	NA	NA	NA	NA	NA	NA	NA	NA	NA	5
Positive	Yes	0	32451	13425	31254	14325	12345	1	NA	NA	NA	NA	NA	1	0	0	0	0	1	1	1	2	2	1	1	1	2	2	0	0	0	1	0	0	0	1	1	0	0	0	1	1	0	0	0	1	1	0	5
Positive	No	1	13254	12354	23415	15234	25341	0	0	2	5	2	4	NA	NA	NA	NA	NA	NA	NA	NA	NA	NA	0	2	5	2	4	NA	NA	NA	NA	NA	NA	NA	NA	NA	NA	NA	NA	NA	NA	NA	NA	NA	NA	NA	NA	1
Negative	No	1	25134	23145	12435	35421	45312	0	1	1	1	2	1	NA	NA	NA	NA	NA	NA	NA	NA	NA	NA	1	1	1	2	1	NA	NA	NA	NA	NA	NA	NA	NA	NA	NA	NA	NA	NA	NA	NA	NA	NA	NA	NA	NA	3
Unknown	No	1	12345	23451	23145	23145	12345	0	1	2	0	2	3	NA	NA	NA	NA	NA	NA	NA	NA	NA	NA	1	2	0	2	3	NA	NA	NA	NA	NA	NA	NA	NA	NA	NA	NA	NA	NA	NA	NA	NA	NA	NA	NA	NA	1
Negative	No	0	21354	15423	14235	51432	54213	1	NA	NA	NA	NA	NA	1	1	1	0	0	0	1	1	2	2	0	1	1	2	2	0	0	0	0	0	0	0	1	1	0	0	0	1	1	0	0	0	0	1	1	2
Negative	No	0	23451	23451	23145	23415	21345	1	NA	NA	NA	NA	NA	1	1	1	0	0	0	1	2	2	0	0	1	2	2	0	0	0	0	0	0	0	0	1	1	0	1	0	1	1	0	0	0	0	0	0	5
Negative	No	1	23145	23451	12345	12345	12345	0	1	2	1	2	1	NA	NA	NA	NA	NA	NA	NA	NA	NA	NA	1	2	1	2	1	NA	NA	NA	NA	NA	NA	NA	NA	NA	NA	NA	NA	NA	NA	NA	NA	NA	NA	NA	NA	3
Positive	No	0	23415	23145	12345	12345	23145	1	NA	NA	NA	NA	NA	1	0	NA	0	0	0	2	2	2	3	0	2	2	2	3	0	0	0	0	0	1	0	1	1	1	0	0	1	1	0	0	0	1	1	1	4
Positive	Yes	1	23415	12345	23145	23145	12345	0	2	2	1	2	2	NA	NA	NA	NA	NA	NA	NA	NA	NA	NA	2	2	1	2	2	NA	NA	NA	NA	NA	NA	NA	NA	NA	NA	NA	NA	NA	NA	NA	NA	NA	NA	NA	NA	4
Positive	No	1	12345	21345	21345	12345	21345	0	0	2	2	2	1	NA	NA	NA	NA	NA	NA	NA	NA	NA	NA	0	2	2	2	1	NA	NA	NA	NA	NA	NA	NA	NA	NA	NA	NA	NA	NA	NA	NA	NA	NA	NA	NA	NA	1
Positive	No	1	23451	12345	23451	21345	23451	0	0	2	1	3	0	NA	NA	NA	NA	NA	NA	NA	NA	NA	NA	0	2	1	3	0	NA	NA	NA	NA	NA	NA	NA	NA	NA	NA	NA	NA	NA	NA	NA	NA	NA	NA	NA	NA	5
Positive	Yes	0	23145	12345	23145	23451	21345	1	NA	NA	NA	NA	NA	0	0	1	0	0	0	2	1	2	1	0	2	1	2	1	0	0	0	0	0	1	0	1	1	0	0	0	1	1	0	0	0	0	1	0	3
Negative	No	0	23145	23451	23415	23145	23415	1	NA	NA	NA	NA	NA	1	0	1	0	0	1	0	2	2	0	1	0	2	2	0	0	0	0	1	0	0	0	0	1	0	1	0	1	1	0	0	0	0	0	0	3
Negative	No	0	23145	23415	23145	21345	23451	1	NA	NA	NA	NA	NA	0	1	1	0	0	0	2	2	2	2	0	2	2	2	2	0	0	0	0	0	0	1	1	1	0	1	0	1	1	0	0	0	1	0	1	3
Positive	Yes	0	12345	12345	23145	23451	12345	1	NA	NA	NA	NA	NA	1	1	0	0	0	0	2	2	4	0	0	2	2	4	0	0	0	0	0	0	0	1	1	1	0	1	0	1	1	1	1	0	0	0	0	1
Positive	No	1	21345	23451	23415	23145	23451	0	2	2	0	1	0	NA	NA	NA	NA	NA	NA	NA	NA	NA	NA	2	2	0	1	0	NA	NA	NA	NA	NA	NA	NA	NA	NA	NA	NA	NA	NA	NA	NA	NA	NA	NA	NA	NA	2
Negative	No	0	23451	23451	23451	12345	23145	1	NA	NA	NA	NA	NA	1	1	1	0	0	0	2	2	1	0	0	2	2	1	0	0	0	0	0	0	1	0	1	1	0	1	0	1	0	0	0	0	0	0	0	5
Positive	Yes	0	53412	35412	12345	35241	41523	1	NA	NA	NA	NA	NA	1	1	1	0	0	0	1	1	3	2	0	1	1	3	2	0	0	0	0	0	0	0	1	1	0	0	0	1	1	1	0	0	0	1	1	4
Positive	No	0	23415	23145	23415	23451	12345	1	NA	NA	NA	NA	NA	1	0	0	0	0	0	1	2	2	1	0	1	2	2	1	0	0	0	0	0	0	0	1	1	0	1	0	1	1	0	0	0	1	0	0	4
Unknown	No	1	23145	23451	23415	21345	12345	0	1	2	1	1	1	NA	NA	NA	NA	NA	NA	NA	NA	NA	NA	1	2	1	1	1	NA	NA	NA	NA	NA	NA	NA	NA	NA	NA	NA	NA	NA	NA	NA	NA	NA	NA	NA	NA	3
Positive	Yes	1	23145	23415	23145	23451	23145	0	1	3	2	4	3	NA	NA	NA	NA	NA	NA	NA	NA	NA	NA	1	3	2	4	3	NA	NA	NA	NA	NA	NA	NA	NA	NA	NA	NA	NA	NA	NA	NA	NA	NA	NA	NA	NA	3
Unknown	No	1	12345	21345	21345	23145	23145	0	0	0	2	1	2	NA	NA	NA	NA	NA	NA	NA	NA	NA	NA	0	0	2	1	2	NA	NA	NA	NA	NA	NA	NA	NA	NA	NA	NA	NA	NA	NA	NA	NA	NA	NA	NA	NA	1
Positive	Yes	0	23145	23451	23415	12345	23145	1	NA	NA	NA	NA	NA	1	1	0	0	0	1	1	1	1	2	1	1	1	1	2	1	0	0	0	0	0	0	1	1	0	0	0	1	0	0	0	0	0	1	1	3
Positive	No	0	23415	23415	21345	12345	21345	1	NA	NA	NA	NA	NA	1	1	1	0	0	0	0	2	1	1	0	0	2	1	1	0	0	0	0	0	0	0	0	1	0	1	0	1	0	0	0	0	0	1	0	4
Positive	Yes	0	12345	12345	23145	23451	12345	1	NA	NA	NA	NA	NA	0	1	1	0	0	0	0	1	2	0	0	0	1	2	0	0	0	0	0	0	0	0	0	1	0	0	0	1	1	0	0	0	0	0	0	1
Positive	Yes	0	23415	21345	12345	23451	23451	1	NA	NA	NA	NA	NA	1	0	0	0	0	0	1	1	2	1	0	1	1	2	1	0	0	0	0	0	0	0	1	1	0	0	0	1	1	0	0	0	0	1	0	4
Positive	No	0	23415	23415	21345	12345	21345	1	NA	NA	NA	NA	NA	1	1	0	0	0	0	1	1	3	3	0	1	1	3	3	0	0	0	0	0	0	0	1	1	0	0	0	1	1	0	1	1	1	1	0	4
Negative	No	1	23145	23145	23451	23415	23145	0	2	1	3	2	1	NA	NA	NA	NA	NA	NA	NA	NA	NA	NA	2	1	3	2	1	NA	NA	NA	NA	NA	NA	NA	NA	NA	NA	NA	NA	NA	NA	NA	NA	NA	NA	NA	NA	3
Positive	Yes	0	21345	23451	23451	23145	12345	1	NA	NA	NA	NA	NA	0	0	0	0	0	0	0	2	2	1	0	0	2	2	1	0	0	0	0	0	0	0	0	1	0	1	0	1	1	0	0	0	0	1	0	2
Positive	Yes	1	12345	23145	23145	23415	23451	0	0	2	2	1	1	NA	NA	NA	NA	NA	NA	NA	NA	NA	NA	0	2	2	1	1	NA	NA	NA	NA	NA	NA	NA	NA	NA	NA	NA	NA	NA	NA	NA	NA	NA	NA	NA	NA	1
Positive	No	1	23451	23145	21345	23451	23145	0	2	2	2	2	0	NA	NA	NA	NA	NA	NA	NA	NA	NA	NA	2	2	2	2	0	NA	NA	NA	NA	NA	NA	NA	NA	NA	NA	NA	NA	NA	NA	NA	NA	NA	NA	NA	NA	5
Positive	Yes	1	23451	21345	23451	21345	23145	0	1	2	1	2	3	NA	NA	NA	NA	NA	NA	NA	NA	NA	NA	1	2	1	2	3	NA	NA	NA	NA	NA	NA	NA	NA	NA	NA	NA	NA	NA	NA	NA	NA	NA	NA	NA	NA	5
Positive	Yes	1	23145	21345	23145	23145	23145	0	0	0	0	2	1	NA	NA	NA	NA	NA	NA	NA	NA	NA	NA	0	0	0	2	1	NA	NA	NA	NA	NA	NA	NA	NA	NA	NA	NA	NA	NA	NA	NA	NA	NA	NA	NA	NA	3
Positive	No	1	23451	23451	23415	12345	23415	0	2	3	2	3	2	NA	NA	NA	NA	NA	NA	NA	NA	NA	NA	2	3	2	3	2	NA	NA	NA	NA	NA	NA	NA	NA	NA	NA	NA	NA	NA	NA	NA	NA	NA	NA	NA	NA	5
Positive	No	1	21345	23145	12345	12345	23451	0	1	1	2	2	1	NA	NA	NA	NA	NA	NA	NA	NA	NA	NA	1	1	2	2	1	NA	NA	NA	NA	NA	NA	NA	NA	NA	NA	NA	NA	NA	NA	NA	NA	NA	NA	NA	NA	2
Positive	No	1	12345	12345	23451	23145	23451	0	1	1	3	2	2	NA	NA	NA	NA	NA	NA	NA	NA	NA	NA	1	1	3	2	2	NA	NA	NA	NA	NA	NA	NA	NA	NA	NA	NA	NA	NA	NA	NA	NA	NA	NA	NA	NA	1
Unknown	No	1	23415	23145	23415	23145	21345	0	1	2	2	2	2	NA	NA	NA	NA	NA	NA	NA	NA	NA	NA	1	2	2	2	2	NA	NA	NA	NA	NA	NA	NA	NA	NA	NA	NA	NA	NA	NA	NA	NA	NA	NA	NA	NA	4
Unknown	No	0	23145	23415	23145	23451	23451	1	NA	NA	NA	NA	NA	0	1	1	0	1	0	1	2	1	0	0	1	2	1	0	0	0	0	0	0	0	0	1	1	0	1	0	1	0	0	0	0	0	0	0	3
Positive	Yes	0	21345	21345	23451	23145	23451	1	NA	NA	NA	NA	NA	0	0	0	0	0	0	0	2	2	0	0	0	2	2	0	0	0	0	0	0	0	0	0	1	0	1	0	1	1	0	0	0	0	0	0	2
Positive	Yes	1	23415	23415	23415	23451	23415	0	1	2	2	3	3	NA	NA	NA	NA	NA	NA	NA	NA	NA	NA	1	2	2	3	3	NA	NA	NA	NA	NA	NA	NA	NA	NA	NA	NA	NA	NA	NA	NA	NA	NA	NA	NA	NA	4
Negative	No	0	12345	23451	12345	23145	23451	1	NA	NA	NA	NA	NA	0	0	1	0	0	0	0	1	1	0	0	0	1	1	0	0	0	0	0	0	0	0	0	0	0	1	0	1	0	0	0	0	0	0	0	1
Positive	Yes	0	51423	24351	15234	15234	54213	1	NA	NA	NA	NA	NA	1	0	0	0	0	0	0	3	1	1	0	0	3	1	1	0	0	0	0	0	0	0	0	1	0	1	1	1	0	0	0	0	0	1	0	2
Positive	Yes	1	54321	34512	23514	53241	41352	0	3	3	2	3	3	NA	NA	NA	NA	NA	NA	NA	NA	NA	NA	3	3	2	3	3	NA	NA	NA	NA	NA	NA	NA	NA	NA	NA	NA	NA	NA	NA	NA	NA	NA	NA	NA	NA	5
Positive	Yes	0	12345	12345	21345	12345	21345	1	NA	NA	NA	NA	NA	1	0	0	0	0	0	1	1	2	1	0	1	1	2	1	0	0	0	0	0	1	0	0	1	0	0	0	1	1	0	0	0	0	1	0	1
Positive	Yes	0	53142	42351	15243	45321	45312	1	NA	NA	NA	NA	NA	1	1	1	0	0	1	2	1	1	2	1	2	1	1	2	1	0	0	0	1	0	0	1	1	0	0	0	1	0	0	0	1	1	0	0	3
Unknown	No	1	21345	12345	12345	23415	12345	0	1	2	1	2	1	NA	NA	NA	NA	NA	NA	NA	NA	NA	NA	1	2	1	2	1	NA	NA	NA	NA	NA	NA	NA	NA	NA	NA	NA	NA	NA	NA	NA	NA	NA	NA	NA	NA	2
Unknown	No	0	23415	23145	23451	21345	23451	1	NA	NA	NA	NA	NA	1	1	1	0	0	0	1	4	2	1	0	1	4	2	1	0	0	0	0	0	0	0	1	1	1	1	1	1	1	0	0	0	0	1	0	4
Unknown	No	1	23451	23145	12345	23145	21345	0	2	0	1	1	1	NA	NA	NA	NA	NA	NA	NA	NA	NA	NA	2	0	1	1	1	NA	NA	NA	NA	NA	NA	NA	NA	NA	NA	NA	NA	NA	NA	NA	NA	NA	NA	NA	NA	5
Unknown	No	0	21345	12345	23145	23415	23145	1	NA	NA	NA	NA	NA	0	0	1	0	0	0	0	2	2	1	0	0	2	2	1	0	0	0	0	0	0	0	0	1	0	1	0	1	1	0	0	0	0	1	0	2
Positive	No	0	12345	23415	23415	23451	23145	1	NA	NA	NA	NA	NA	0	1	0	0	0	0	2	1	2	0	0	2	1	2	0	0	0	0	0	0	1	0	1	0	0	1	0	1	1	0	0	0	0	0	0	1
Positive	Yes	0	23145	23145	23415	23451	21345	1	NA	NA	NA	NA	NA	1	0	0	0	0	0	1	2	2	1	0	1	2	2	1	0	0	0	0	0	1	0	0	1	0	1	0	1	1	0	0	0	0	1	0	3
Positive	Yes	1	15324	14253	45132	53142	25341	0	1	1	2	1	0	NA	NA	NA	NA	NA	NA	NA	NA	NA	NA	1	1	2	1	0	NA	NA	NA	NA	NA	NA	NA	NA	NA	NA	NA	NA	NA	NA	NA	NA	NA	NA	NA	NA	1
Negative	No	0	23145	23415	23145	23451	23451	1	NA	NA	NA	NA	NA	0	1	1	0	0	0	0	1	2	0	0	0	1	2	0	0	0	0	0	0	0	0	0	1	0	0	0	1	1	0	0	0	0	0	0	3
Positive	No	1	12543	25341	25413	43521	54213	0	2	3	2	2	0	NA	NA	NA	NA	NA	NA	NA	NA	NA	NA	2	3	2	2	0	NA	NA	NA	NA	NA	NA	NA	NA	NA	NA	NA	NA	NA	NA	NA	NA	NA	NA	NA	NA	1
Negative	No	0	21345	41532	23451	32514	32154	1	NA	NA	NA	NA	NA	1	1	1	0	0	0	0	2	2	1	0	0	2	2	1	0	0	0	0	0	0	0	0	1	1	0	0	1	1	0	0	0	0	1	0	2
Unknown	No	1	24513	25341	23145	32415	53214	0	0	3	4	2	1	NA	NA	NA	NA	NA	NA	NA	NA	NA	NA	0	3	4	2	1	NA	NA	NA	NA	NA	NA	NA	NA	NA	NA	NA	NA	NA	NA	NA	NA	NA	NA	NA	NA	4
Positive	Yes	1	42315	42351	32541	53142	45132	0	0	1	2	2	1	NA	NA	NA	NA	NA	NA	NA	NA	NA	NA	0	1	2	2	1	NA	NA	NA	NA	NA	NA	NA	NA	NA	NA	NA	NA	NA	NA	NA	NA	NA	NA	NA	NA	4
Positive	No	1	25431	32514	41235	45321	32415	0	0	0	2	3	3	NA	NA	NA	NA	NA	NA	NA	NA	NA	NA	0	0	2	3	3	NA	NA	NA	NA	NA	NA	NA	NA	NA	NA	NA	NA	NA	NA	NA	NA	NA	NA	NA	NA	5
Positive	No	1	14235	21543	14253	41523	45231	0	0	5	3	3	2	NA	NA	NA	NA	NA	NA	NA	NA	NA	NA	0	5	3	3	2	NA	NA	NA	NA	NA	NA	NA	NA	NA	NA	NA	NA	NA	NA	NA	NA	NA	NA	NA	NA	1
Positive	Yes	1	23145	12345	23415	12345	12345	0	1	0	2	4	0	NA	NA	NA	NA	NA	NA	NA	NA	NA	NA	1	0	2	4	0	NA	NA	NA	NA	NA	NA	NA	NA	NA	NA	NA	NA	NA	NA	NA	NA	NA	NA	NA	NA	3
Positive	Yes	1	34512	31254	45321	52314	24135	0	0	2	2	2	2	NA	NA	NA	NA	NA	NA	NA	NA	NA	NA	0	2	2	2	2	NA	NA	NA	NA	NA	NA	NA	NA	NA	NA	NA	NA	NA	NA	NA	NA	NA	NA	NA	NA	4
Negative	No	0	53142	35241	24315	41532	23415	1	NA	NA	NA	NA	NA	0	0	1	0	0	0	1	1	2	0	0	1	1	2	0	0	0	0	0	0	1	0	0	1	0	0	0	1	1	0	0	0	0	0	0	3
Positive	No	1	52143	35142	53241	12345	21435	0	0	3	3	0	0	NA	NA	NA	NA	NA	NA	NA	NA	NA	NA	0	3	3	0	0	NA	NA	NA	NA	NA	NA	NA	NA	NA	NA	NA	NA	NA	NA	NA	NA	NA	NA	NA	NA	3
Negative	No	0	14352	43152	35412	51243	31524	1	NA	NA	NA	NA	NA	1	0	1	0	0	0	0	1	2	0	0	0	1	2	0	0	0	0	0	0	0	0	0	1	0	0	0	1	1	0	0	0	0	0	0	1
Negative	No	1	43521	41253	45213	12534	42531	0	3	3	4	1	4	NA	NA	NA	NA	NA	NA	NA	NA	NA	NA	3	3	4	1	4	NA	NA	NA	NA	NA	NA	NA	NA	NA	NA	NA	NA	NA	NA	NA	NA	NA	NA	NA	NA	5
Positive	Yes	0	51432	51234	51432	53214	42315	1	NA	NA	NA	NA	NA	1	0	0	1	0	0	3	1	1	3	0	3	1	1	3	0	0	0	0	0	1	1	1	1	0	0	0	1	0	0	0	0	1	1	1	2
Positive	No	0	23154	41325	51243	54123	51324	1	NA	NA	NA	NA	NA	0	NA	0	NA	0	1	0	1	1	0	1	0	1	1	0	1	0	0	0	0	0	0	0	1	0	0	0	1	0	0	0	0	0	0	0	3
Unknown	No	0	21345	12345	12345	21345	21345	1	NA	NA	NA	NA	NA	0	0	1	0	1	0	0	1	1	0	0	0	1	1	0	0	0	0	0	0	0	0	0	1	0	0	0	1	0	0	0	0	0	0	0	2
Positive	Yes	1	23415	23451	12345	21345	23415	0	2	2	2	2	4	NA	NA	NA	NA	NA	NA	NA	NA	NA	NA	2	2	2	2	4	NA	NA	NA	NA	NA	NA	NA	NA	NA	NA	NA	NA	NA	NA	NA	NA	NA	NA	NA	NA	4
Negative	No	1	14253	42351	35421	32154	34251	0	1	2	2	3	4	NA	NA	NA	NA	NA	NA	NA	NA	NA	NA	1	2	2	3	4	NA	NA	NA	NA	NA	NA	NA	NA	NA	NA	NA	NA	NA	NA	NA	NA	NA	NA	NA	NA	1
Positive	No	1	23145	12345	23451	21345	12345	0	1	2	1	2	1	NA	NA	NA	NA	NA	NA	NA	NA	NA	NA	1	2	1	2	1	NA	NA	NA	NA	NA	NA	NA	NA	NA	NA	NA	NA	NA	NA	NA	NA	NA	NA	NA	NA	3
Positive	Yes	0	23451	23451	23145	23145	12345	1	NA	NA	NA	NA	NA	0	1	0	0	0	0	2	1	2	1	0	2	1	2	1	0	0	0	0	0	1	0	1	1	0	0	0	1	0	0	1	1	0	0	0	5
Negative	No	1	12345	23145	12345	21345	12345	0	1	1	0	3	3	NA	NA	NA	NA	NA	NA	NA	NA	NA	NA	1	1	0	3	3	NA	NA	NA	NA	NA	NA	NA	NA	NA	NA	NA	NA	NA	NA	NA	NA	NA	NA	NA	NA	1
Negative	No	1	21345	12345	23415	23145	12345	0	1	0	1	1	1	NA	NA	NA	NA	NA	NA	NA	NA	NA	NA	1	0	1	1	1	NA	NA	NA	NA	NA	NA	NA	NA	NA	NA	NA	NA	NA	NA	NA	NA	NA	NA	NA	NA	2
Unknown	No	0	23145	12345	21345	23415	23415	1	NA	NA	NA	NA	NA	1	1	1	0	0	0	2	2	2	0	0	2	2	2	0	0	0	0	0	0	1	0	1	1	0	1	0	1	1	0	0	0	0	0	0	3
Positive	Yes	1	51234	21543	34215	54231	12453	0	1	4	3	2	3	NA	NA	NA	NA	NA	NA	NA	NA	NA	NA	1	4	3	2	3	NA	NA	NA	NA	NA	NA	NA	NA	NA	NA	NA	NA	NA	NA	NA	NA	NA	NA	NA	NA	2
Positive	Yes	0	23451	23415	23451	23415	12345	1	NA	NA	NA	NA	NA	1	1	1	0	1	1	1	2	2	0	1	1	2	2	0	0	0	0	1	0	0	0	1	1	0	1	0	1	1	0	0	0	0	0	0	5
Positive	No	1	23415	23415	23451	21345	21345	0	0	1	1	2	2	NA	NA	NA	NA	NA	NA	NA	NA	NA	NA	0	1	1	2	2	NA	NA	NA	NA	NA	NA	NA	NA	NA	NA	NA	NA	NA	NA	NA	NA	NA	NA	NA	NA	4
Positive	Yes	0	12345	23451	12345	12345	23451	1	NA	NA	NA	NA	NA	1	0	1	0	0	0	1	2	3	2	0	1	2	3	2	0	0	0	0	0	0	0	1	1	0	1	0	1	1	0	1	0	1	1	0	1
Negative	No	0	42513	52341	45213	21453	12345	1	NA	NA	NA	NA	NA	0	0	1	0	0	0	1	3	1	1	0	1	3	1	1	0	0	0	0	0	0	0	1	1	0	1	1	1	0	0	0	0	1	0	0	4
Negative	No	1	12345	23145	21345	12345	23451	0	1	1	2	3	1	NA	NA	NA	NA	NA	NA	NA	NA	NA	NA	1	1	2	3	1	NA	NA	NA	NA	NA	NA	NA	NA	NA	NA	NA	NA	NA	NA	NA	NA	NA	NA	NA	NA	1
Negative	No	0	32145	23451	53241	25134	52413	1	NA	NA	NA	NA	NA	0	0	0	0	0	0	2	1	1	2	0	2	1	1	2	0	0	0	0	0	1	0	1	0	0	1	0	1	0	0	0	0	0	1	1	3
Positive	Yes	1	23145	21345	23145	23415	12345	0	2	3	2	2	1	NA	NA	NA	NA	NA	NA	NA	NA	NA	NA	2	3	2	2	1	NA	NA	NA	NA	NA	NA	NA	NA	NA	NA	NA	NA	NA	NA	NA	NA	NA	NA	NA	NA	3
Positive	No	1	12345	21345	23415	23415	12345	0	1	2	1	2	1	NA	NA	NA	NA	NA	NA	NA	NA	NA	NA	1	2	1	2	1	NA	NA	NA	NA	NA	NA	NA	NA	NA	NA	NA	NA	NA	NA	NA	NA	NA	NA	NA	NA	1
Positive	No	0	12345	23451	23145	12345	12345	1	NA	NA	NA	NA	NA	1	1	0	0	0	1	2	1	1	1	1	2	1	1	1	0	0	0	1	0	1	0	1	1	0	0	0	1	0	0	0	0	0	1	0	1
Positive	No	1	21345	12345	23145	23145	23415	0	0	2	4	1	2	NA	NA	NA	NA	NA	NA	NA	NA	NA	NA	0	2	4	1	2	NA	NA	NA	NA	NA	NA	NA	NA	NA	NA	NA	NA	NA	NA	NA	NA	NA	NA	NA	NA	2
Positive	No	1	21345	23145	21345	21345	12345	0	0	0	1	1	1	NA	NA	NA	NA	NA	NA	NA	NA	NA	NA	0	0	1	1	1	NA	NA	NA	NA	NA	NA	NA	NA	NA	NA	NA	NA	NA	NA	NA	NA	NA	NA	NA	NA	2
Positive	No	0	23415	23451	23451	21345	23451	1	NA	NA	NA	NA	NA	0	1	0	0	0	1	0	1	2	1	1	0	1	2	1	0	0	0	1	0	0	0	0	1	0	0	0	1	1	0	0	0	0	1	0	4
Unknown	No	1	32145	25413	42531	35214	53421	0	1	1	3	2	2	NA	NA	NA	NA	NA	NA	NA	NA	NA	NA	1	1	3	2	2	NA	NA	NA	NA	NA	NA	NA	NA	NA	NA	NA	NA	NA	NA	NA	NA	NA	NA	NA	NA	3
Positive	Yes	0	21345	12345	23415	21345	23145	1	NA	NA	NA	NA	NA	1	1	0	0	0	0	2	2	2	0	0	2	2	2	0	0	0	0	0	0	1	0	1	1	0	1	0	1	1	0	0	0	0	0	0	2
Negative	No	1	23451	23415	21345	23451	23415	0	2	1	2	3	0	NA	NA	NA	NA	NA	NA	NA	NA	NA	NA	2	1	2	3	0	NA	NA	NA	NA	NA	NA	NA	NA	NA	NA	NA	NA	NA	NA	NA	NA	NA	NA	NA	NA	5
Positive	No	1	12345	12345	23415	12345	21345	0	1	1	1	2	1	NA	NA	NA	NA	NA	NA	NA	NA	NA	NA	1	1	1	2	1	NA	NA	NA	NA	NA	NA	NA	NA	NA	NA	NA	NA	NA	NA	NA	NA	NA	NA	NA	NA	1
Positive	Yes	0	23145	21345	23145	23145	23145	1	NA	NA	NA	NA	NA	1	1	NA	0	0	0	2	1	NA	1	0	2	1	NA	1	0	0	0	0	0	1	0	1	1	0	0	0	1	NA	0	0	0	0	1	0	3
Negative	No	0	21345	23451	23451	12345	21345	1	NA	NA	NA	NA	NA	1	0	1	0	0	0	1	1	2	1	0	1	1	2	1	0	0	0	0	1	0	0	0	1	0	0	0	1	0	0	1	0	0	1	0	2
Positive	No	1	21345	12345	21345	21345	21345	0	1	1	2	3	1	NA	NA	NA	NA	NA	NA	NA	NA	NA	NA	1	1	2	3	1	NA	NA	NA	NA	NA	NA	NA	NA	NA	NA	NA	NA	NA	NA	NA	NA	NA	NA	NA	NA	2
Positive	Yes	0	21345	23451	12345	12345	12345	1	NA	NA	NA	NA	NA	1	1	NA	0	0	0	1	1	1	0	0	1	1	1	0	0	0	0	0	0	0	0	1	1	0	0	0	1	0	0	0	0	0	0	0	2
Positive	No	1	23145	23415	23415	23415	23451	0	2	1	3	2	1	NA	NA	NA	NA	NA	NA	NA	NA	NA	NA	2	1	3	2	1	NA	NA	NA	NA	NA	NA	NA	NA	NA	NA	NA	NA	NA	NA	NA	NA	NA	NA	NA	NA	3
Negative	No	1	23451	23145	12345	12345	23451	0	1	2	2	2	1	NA	NA	NA	NA	NA	NA	NA	NA	NA	NA	1	2	2	2	1	NA	NA	NA	NA	NA	NA	NA	NA	NA	NA	NA	NA	NA	NA	NA	NA	NA	NA	NA	NA	5
Positive	Yes	1	12345	21345	23415	23451	21345	0	1	3	3	1	1	NA	NA	NA	NA	NA	NA	NA	NA	NA	NA	1	3	3	1	1	NA	NA	NA	NA	NA	NA	NA	NA	NA	NA	NA	NA	NA	NA	NA	NA	NA	NA	NA	NA	1
Positive	No	1	12345	23145	21345	23145	23451	0	0	1	2	2	0	NA	NA	NA	NA	NA	NA	NA	NA	NA	NA	0	1	2	2	0	NA	NA	NA	NA	NA	NA	NA	NA	NA	NA	NA	NA	NA	NA	NA	NA	NA	NA	NA	NA	1
Positive	Yes	1	32145	25431	21543	14253	53241	0	1	2	2	2	1	NA	NA	NA	NA	NA	NA	NA	NA	NA	NA	1	2	2	2	1	NA	NA	NA	NA	NA	NA	NA	NA	NA	NA	NA	NA	NA	NA	NA	NA	NA	NA	NA	NA	3
Unknown	No	0	23145	12345	21345	23145	12345	1	NA	NA	NA	NA	NA	0	1	1	0	0	0	2	1	1	0	0	2	1	1	0	0	0	0	0	0	1	0	1	1	0	0	0	1	0	0	0	0	0	0	0	3
Positive	Yes	1	23541	45123	13425	23145	35412	0	1	0	2	2	1	NA	NA	NA	NA	NA	NA	NA	NA	NA	NA	1	0	2	2	1	NA	NA	NA	NA	NA	NA	NA	NA	NA	NA	NA	NA	NA	NA	NA	NA	NA	NA	NA	NA	5
Positive	Yes	0	23415	23145	23451	12345	23451	1	NA	NA	NA	NA	NA	0	1	0	0	0	1	2	2	3	1	1	2	2	3	1	1	0	0	0	1	0	0	1	1	0	1	0	1	1	0	1	0	0	1	0	4
Positive	No	1	23451	12345	12345	21345	12345	0	0	1	2	2	0	NA	NA	NA	NA	NA	NA	NA	NA	NA	NA	0	1	2	2	0	NA	NA	NA	NA	NA	NA	NA	NA	NA	NA	NA	NA	NA	NA	NA	NA	NA	NA	NA	NA	5
Positive	Yes	0	23145	12345	23451	23145	23415	1	NA	NA	NA	NA	NA	1	1	1	0	0	1	1	1	2	1	1	1	1	2	1	1	0	0	0	0	0	0	1	1	0	0	0	1	1	0	0	0	0	1	0	3
Negative	No	1	12345	23451	23145	23145	12345	0	2	3	3	3	4	NA	NA	NA	NA	NA	NA	NA	NA	NA	NA	2	3	3	3	4	NA	NA	NA	NA	NA	NA	NA	NA	NA	NA	NA	NA	NA	NA	NA	NA	NA	NA	NA	NA	1
Positive	Yes	0	12345	21345	12345	23451	23451	1	NA	NA	NA	NA	NA	1	1	0	0	0	1	1	1	2	1	1	1	1	2	1	1	0	0	0	0	1	0	0	1	0	0	0	1	1	0	0	0	1	0	0	1
Unknown	No	1	12345	23145	12345	21345	23145	0	1	0	2	2	1	NA	NA	NA	NA	NA	NA	NA	NA	NA	NA	1	0	2	2	1	NA	NA	NA	NA	NA	NA	NA	NA	NA	NA	NA	NA	NA	NA	NA	NA	NA	NA	NA	NA	1
Positive	No	0	23514	52431	54213	54213	15243	1	NA	NA	NA	NA	NA	0	0	0	0	1	0	1	1	2	2	0	1	1	2	2	0	0	0	0	0	0	0	1	1	0	0	0	1	1	0	0	0	1	1	0	4
Negative	No	0	53124	54132	31452	43152	32145	1	NA	NA	NA	NA	NA	1	1	1	0	0	2	1	2	2	0	2	1	2	2	0	1	0	0	1	0	1	0	0	1	0	1	0	1	0	0	1	0	0	0	0	3
Positive	Yes	1	12345	21345	23415	23145	23145	0	1	1	2	2	1	NA	NA	NA	NA	NA	NA	NA	NA	NA	NA	1	1	2	2	1	NA	NA	NA	NA	NA	NA	NA	NA	NA	NA	NA	NA	NA	NA	NA	NA	NA	NA	NA	NA	1
Negative	No	0	12345	21345	23451	23451	12345	1	NA	NA	NA	NA	NA	0	0	0	0	1	0	1	1	1	1	0	1	1	1	1	0	0	0	0	0	0	0	1	1	0	0	0	1	0	0	0	1	0	0	0	1
Negative	No	1	43512	21435	35241	45312	24315	0	2	2	1	3	2	NA	NA	NA	NA	NA	NA	NA	NA	NA	NA	2	2	1	3	2	NA	NA	NA	NA	NA	NA	NA	NA	NA	NA	NA	NA	NA	NA	NA	NA	NA	NA	NA	NA	4
Unknown	No	0	23451	21345	23451	23451	23415	1	NA	NA	NA	NA	NA	1	0	1	0	0	0	0	1	2	1	0	0	1	2	1	0	0	0	0	0	0	0	0	1	0	0	0	1	1	0	0	0	0	1	0	5
Positive	No	1	23145	21345	12345	12345	23415	0	2	2	2	3	2	NA	NA	NA	NA	NA	NA	NA	NA	NA	NA	2	2	2	3	2	NA	NA	NA	NA	NA	NA	NA	NA	NA	NA	NA	NA	NA	NA	NA	NA	NA	NA	NA	NA	3
Positive	No	1	23415	21345	23415	23145	23451	0	2	3	2	2	2	NA	NA	NA	NA	NA	NA	NA	NA	NA	NA	2	3	2	2	2	NA	NA	NA	NA	NA	NA	NA	NA	NA	NA	NA	NA	NA	NA	NA	NA	NA	NA	NA	NA	4
Positive	Yes	1	23145	23145	23145	21345	12345	0	2	2	3	2	2	NA	NA	NA	NA	NA	NA	NA	NA	NA	NA	2	2	3	2	2	NA	NA	NA	NA	NA	NA	NA	NA	NA	NA	NA	NA	NA	NA	NA	NA	NA	NA	NA	NA	3
Positive	Yes	0	23145	23451	12345	23451	23145	1	NA	NA	NA	NA	NA	1	0	0	0	0	1	1	1	2	2	1	1	1	2	2	0	0	0	1	0	0	0	1	1	0	0	0	1	1	0	0	0	1	0	1	3
Negative	No	1	42153	45213	43512	54321	54231	0	0	2	2	1	1	NA	NA	NA	NA	NA	NA	NA	NA	NA	NA	0	2	2	1	1	NA	NA	NA	NA	NA	NA	NA	NA	NA	NA	NA	NA	NA	NA	NA	NA	NA	NA	NA	NA	3
Positive	Yes	0	23451	23451	21345	23145	23145	1	NA	NA	NA	NA	NA	1	1	0	0	0	1	2	1	2	1	1	2	1	2	1	1	0	0	0	1	0	0	1	1	0	0	0	1	1	0	0	0	1	0	0	5
Positive	No	0	42135	52413	51432	42153	25143	1	NA	NA	NA	NA	NA	1	1	1	0	0	1	0	2	2	2	1	0	2	2	2	0	0	0	1	0	0	0	0	1	0	1	0	1	1	0	0	0	1	1	0	3
Positive	No	1	23415	23451	23145	12345	23415	0	1	0	2	2	1	NA	NA	NA	NA	NA	NA	NA	NA	NA	NA	1	0	2	2	1	NA	NA	NA	NA	NA	NA	NA	NA	NA	NA	NA	NA	NA	NA	NA	NA	NA	NA	NA	NA	4
Unknown	No	1	21345	23415	12345	12345	23415	0	2	1	2	2	2	NA	NA	NA	NA	NA	NA	NA	NA	NA	NA	2	1	2	2	2	NA	NA	NA	NA	NA	NA	NA	NA	NA	NA	NA	NA	NA	NA	NA	NA	NA	NA	NA	NA	2
Negative	No	1	23451	23415	12345	21345	21345	0	1	3	3	2	1	NA	NA	NA	NA	NA	NA	NA	NA	NA	NA	1	3	3	2	1	NA	NA	NA	NA	NA	NA	NA	NA	NA	NA	NA	NA	NA	NA	NA	NA	NA	NA	NA	NA	5
Negative	No	0	53124	54231	31542	24315	13425	1	NA	NA	NA	NA	NA	1	NA	1	0	0	1	1	3	1	0	1	1	3	1	0	0	0	0	1	0	0	0	1	1	0	1	1	1	0	0	0	0	0	0	0	3
Unknown	No	1	52314	14253	52143	32145	15342	0	1	1	3	3	3	NA	NA	NA	NA	NA	NA	NA	NA	NA	NA	1	1	3	3	3	NA	NA	NA	NA	NA	NA	NA	NA	NA	NA	NA	NA	NA	NA	NA	NA	NA	NA	NA	NA	4
Unknown	No	1	23145	23145	23145	23415	23145	0	2	0	2	1	2	NA	NA	NA	NA	NA	NA	NA	NA	NA	NA	2	0	2	1	2	NA	NA	NA	NA	NA	NA	NA	NA	NA	NA	NA	NA	NA	NA	NA	NA	NA	NA	NA	NA	3
Positive	Yes	0	23415	23415	12345	12345	23145	1	NA	NA	NA	NA	NA	1	1	0	0	0	0	1	3	2	0	0	1	3	2	0	0	0	0	0	0	0	0	1	1	1	1	0	1	1	0	0	0	0	0	0	4
Negative	No	1	23145	23145	21345	12345	23145	0	1	0	3	2	2	NA	NA	NA	NA	NA	NA	NA	NA	NA	NA	1	0	3	2	2	NA	NA	NA	NA	NA	NA	NA	NA	NA	NA	NA	NA	NA	NA	NA	NA	NA	NA	NA	NA	3
Positive	Yes	0	14325	34251	23415	52314	53124	1	NA	NA	NA	NA	NA	1	0	0	0	0	1	1	1	2	1	1	1	1	2	1	0	0	0	1	0	1	0	0	1	0	0	0	1	1	0	0	0	0	1	0	1
Negative	No	1	31254	42351	24135	53412	13425	0	0	1	2	1	2	NA	NA	NA	NA	NA	NA	NA	NA	NA	NA	0	1	2	1	2	NA	NA	NA	NA	NA	NA	NA	NA	NA	NA	NA	NA	NA	NA	NA	NA	NA	NA	NA	NA	2
Positive	No	1	41253	42531	53412	34521	42351	0	2	3	0	3	3	NA	NA	NA	NA	NA	NA	NA	NA	NA	NA	2	3	0	3	3	NA	NA	NA	NA	NA	NA	NA	NA	NA	NA	NA	NA	NA	NA	NA	NA	NA	NA	NA	NA	2
Positive	No	1	23145	21345	12345	21345	21345	0	0	3	2	3	1	NA	NA	NA	NA	NA	NA	NA	NA	NA	NA	0	3	2	3	1	NA	NA	NA	NA	NA	NA	NA	NA	NA	NA	NA	NA	NA	NA	NA	NA	NA	NA	NA	NA	3
Positive	Yes	0	21345	23145	21345	21345	23415	1	NA	NA	NA	NA	NA	0	1	1	0	0	2	1	2	2	3	2	1	2	2	3	1	0	0	1	0	0	0	1	1	0	1	0	0	1	1	0	1	1	1	0	2
Positive	No	1	21345	23451	21345	23415	23451	0	1	1	3	3	1	NA	NA	NA	NA	NA	NA	NA	NA	NA	NA	1	1	3	3	1	NA	NA	NA	NA	NA	NA	NA	NA	NA	NA	NA	NA	NA	NA	NA	NA	NA	NA	NA	NA	2
Positive	Yes	0	23451	23451	23415	23415	12345	1	NA	NA	NA	NA	NA	1	1	0	0	0	1	1	2	2	2	1	1	2	2	2	0	0	0	1	0	1	0	0	1	0	1	0	1	0	1	0	0	0	1	1	5
Positive	No	0	12543	24513	54123	32451	34521	1	NA	NA	NA	NA	NA	1	0	0	0	1	0	3	1	3	2	0	3	1	3	2	0	0	0	0	1	1	0	1	0	0	1	0	1	0	1	1	0	1	0	1	1
Unknown	No	0	21345	21345	23145	23451	21345	1	NA	NA	NA	NA	NA	0	1	1	0	0	1	0	1	1	0	1	0	1	1	0	0	0	1	0	0	0	0	0	1	0	0	0	1	0	0	0	0	0	0	0	2
Positive	Yes	0	12345	23415	23415	23451	21345	1	NA	NA	NA	NA	NA	0	0	1	0	0	0	1	2	3	1	0	1	2	3	1	0	0	0	0	0	0	0	1	1	0	1	0	1	1	0	1	0	0	1	0	1
Positive	No	0	12345	23415	23451	12345	23451	1	NA	NA	NA	NA	NA	1	0	0	0	0	0	1	1	2	1	0	1	1	2	1	0	0	0	0	0	0	0	1	1	0	0	0	1	1	0	0	0	0	1	0	1
Negative	No	1	23415	23415	12345	21345	12345	0	1	3	1	3	4	NA	NA	NA	NA	NA	NA	NA	NA	NA	NA	1	3	1	3	4	NA	NA	NA	NA	NA	NA	NA	NA	NA	NA	NA	NA	NA	NA	NA	NA	NA	NA	NA	NA	4
Unknown	No	0	23415	12345	12345	12345	23145	1	NA	NA	NA	NA	NA	1	0	1	0	0	0	1	1	3	1	0	1	1	3	1	0	0	0	0	0	0	0	1	1	0	0	0	1	1	1	0	0	0	1	0	4
Positive	No	0	23451	23415	21345	12345	23451	1	NA	NA	NA	NA	NA	1	1	1	0	0	1	1	2	1	1	1	1	2	1	1	1	0	0	0	0	0	0	1	1	0	1	0	1	0	0	0	1	0	0	0	5
Positive	Yes	0	23451	12345	12345	21345	23145	1	NA	NA	NA	NA	NA	1	1	1	0	0	1	1	0	2	1	1	1	0	2	1	0	0	0	1	0	0	0	1	0	0	0	0	1	1	0	0	0	0	1	0	5
Unknown	No	1	15324	43215	45132	24351	14523	0	1	1	2	2	1	NA	NA	NA	NA	NA	NA	NA	NA	NA	NA	1	1	2	2	1	NA	NA	NA	NA	NA	NA	NA	NA	NA	NA	NA	NA	NA	NA	NA	NA	NA	NA	NA	NA	1
Positive	Yes	1	31524	53142	15243	43152	23451	0	0	1	2	2	2	NA	NA	NA	NA	NA	NA	NA	NA	NA	NA	0	1	2	2	2	NA	NA	NA	NA	NA	NA	NA	NA	NA	NA	NA	NA	NA	NA	NA	NA	NA	NA	NA	NA	2
Positive	No	0	23145	23415	23451	12345	23145	1	NA	NA	NA	NA	NA	1	NA	0	0	0	0	1	3	2	2	0	1	3	2	2	0	0	0	0	0	0	0	1	1	0	1	1	1	1	0	0	0	1	1	0	3
Unknown	No	1	21345	23145	23145	12345	23451	0	1	2	3	2	2	NA	NA	NA	NA	NA	NA	NA	NA	NA	NA	1	2	3	2	2	NA	NA	NA	NA	NA	NA	NA	NA	NA	NA	NA	NA	NA	NA	NA	NA	NA	NA	NA	NA	2
Positive	No	1	23451	21345	23451	21345	12345	0	1	0	3	3	2	NA	NA	NA	NA	NA	NA	NA	NA	NA	NA	1	0	3	3	2	NA	NA	NA	NA	NA	NA	NA	NA	NA	NA	NA	NA	NA	NA	NA	NA	NA	NA	NA	NA	5
Unknown	No	1	12345	23145	23145	23145	12345	0	1	2	3	4	3	NA	NA	NA	NA	NA	NA	NA	NA	NA	NA	1	2	3	4	3	NA	NA	NA	NA	NA	NA	NA	NA	NA	NA	NA	NA	NA	NA	NA	NA	NA	NA	NA	NA	1
Negative	No	0	23451	23415	21345	23451	12345	1	NA	NA	NA	NA	NA	0	0	1	0	0	0	0	0	2	1	0	0	0	2	1	0	0	0	0	0	0	0	0	0	0	0	0	1	1	0	0	0	1	0	0	5
Unknown	No	0	23145	12345	23145	23145	23415	1	NA	NA	NA	NA	NA	1	1	1	0	1	0	1	1	1	0	0	1	1	1	0	0	0	0	0	0	1	0	0	1	0	0	0	1	0	0	0	0	0	0	0	3
Positive	Yes	1	21345	21345	12345	23415	23415	0	1	1	1	2	1	NA	NA	NA	NA	NA	NA	NA	NA	NA	NA	1	1	1	2	1	NA	NA	NA	NA	NA	NA	NA	NA	NA	NA	NA	NA	NA	NA	NA	NA	NA	NA	NA	NA	2
Positive	No	0	23451	21345	23145	23415	23145	1	NA	NA	NA	NA	NA	1	1	0	0	0	0	1	1	1	1	0	1	1	1	1	0	0	0	0	0	0	0	1	1	0	0	0	1	0	0	0	0	0	1	0	5
Unknown	No	1	12345	21345	21345	23145	23451	0	0	2	2	2	0	NA	NA	NA	NA	NA	NA	NA	NA	NA	NA	0	2	2	2	0	NA	NA	NA	NA	NA	NA	NA	NA	NA	NA	NA	NA	NA	NA	NA	NA	NA	NA	NA	NA	1
Positive	Yes	1	21345	23145	23451	23451	23415	0	1	3	2	1	0	NA	NA	NA	NA	NA	NA	NA	NA	NA	NA	1	3	2	1	0	NA	NA	NA	NA	NA	NA	NA	NA	NA	NA	NA	NA	NA	NA	NA	NA	NA	NA	NA	NA	2
Positive	Yes	0	21345	12345	23451	23451	23145	1	NA	NA	NA	NA	NA	1	1	0	0	0	0	2	2	2	3	0	2	2	2	3	0	0	0	0	0	1	0	1	1	0	1	0	1	1	0	0	1	1	1	0	2
Positive	Yes	0	12345	23415	23451	12345	23145	1	NA	NA	NA	NA	NA	1	NA	1	NA	0	0	1	1	2	0	0	1	1	2	0	0	0	0	0	0	0	0	1	1	0	0	0	1	1	0	0	0	0	0	0	1
Positive	No	1	12345	23451	23145	12345	23145	0	1	2	3	2	1	NA	NA	NA	NA	NA	NA	NA	NA	NA	NA	1	2	3	2	1	NA	NA	NA	NA	NA	NA	NA	NA	NA	NA	NA	NA	NA	NA	NA	NA	NA	NA	NA	NA	1
Positive	No	1	23415	12345	23415	23451	23145	0	2	3	2	1	4	NA	NA	NA	NA	NA	NA	NA	NA	NA	NA	2	3	2	1	4	NA	NA	NA	NA	NA	NA	NA	NA	NA	NA	NA	NA	NA	NA	NA	NA	NA	NA	NA	NA	4
Positive	No	0	12345	12345	21345	23145	21345	1	NA	NA	NA	NA	NA	0	1	1	0	0	0	2	1	1	2	0	2	1	1	2	0	0	0	0	0	1	0	1	1	0	0	0	0	1	0	0	0	1	1	0	1
Negative	No	1	23451	12345	21345	21345	23451	0	0	2	3	2	2	NA	NA	NA	NA	NA	NA	NA	NA	NA	NA	0	2	3	2	2	NA	NA	NA	NA	NA	NA	NA	NA	NA	NA	NA	NA	NA	NA	NA	NA	NA	NA	NA	NA	5
Positive	No	1	21345	12345	21345	23451	23145	0	0	0	2	2	1	NA	NA	NA	NA	NA	NA	NA	NA	NA	NA	0	0	2	2	1	NA	NA	NA	NA	NA	NA	NA	NA	NA	NA	NA	NA	NA	NA	NA	NA	NA	NA	NA	NA	2
Positive	No	1	12345	23415	23145	12345	23145	0	1	0	2	2	2	NA	NA	NA	NA	NA	NA	NA	NA	NA	NA	1	0	2	2	2	NA	NA	NA	NA	NA	NA	NA	NA	NA	NA	NA	NA	NA	NA	NA	NA	NA	NA	NA	NA	1
Positive	No	1	21345	21345	23145	12345	23415	0	0	0	2	2	2	NA	NA	NA	NA	NA	NA	NA	NA	NA	NA	0	0	2	2	2	NA	NA	NA	NA	NA	NA	NA	NA	NA	NA	NA	NA	NA	NA	NA	NA	NA	NA	NA	NA	2
Positive	No	0	23145	21345	21345	23415	23145	1	NA	NA	NA	NA	NA	1	1	1	0	0	0	1	1	1	0	0	1	1	1	0	0	0	0	0	0	0	0	1	1	0	0	0	1	0	0	0	0	0	0	0	3
Positive	No	0	21345	23415	12345	12345	23451	1	NA	NA	NA	NA	NA	1	1	0	0	0	0	0	3	2	1	0	0	3	2	1	0	0	0	0	0	0	0	0	1	0	1	1	1	1	0	0	0	1	0	0	2
Negative	No	0	21345	23415	23451	23415	23145	1	NA	NA	NA	NA	NA	0	0	1	0	0	1	2	2	3	1	1	2	2	3	1	0	0	0	1	0	1	0	1	1	0	0	1	1	1	0	1	0	1	0	0	2
Positive	No	0	12345	21345	21345	12345	23415	1	NA	NA	NA	NA	NA	1	1	1	0	1	0	1	1	3	1	0	1	1	3	1	0	0	0	0	0	1	0	0	1	0	0	0	1	1	0	1	1	0	0	0	1
Positive	No	1	23145	21345	23145	23415	23415	0	1	1	2	1	1	NA	NA	NA	NA	NA	NA	NA	NA	NA	NA	1	1	2	1	1	NA	NA	NA	NA	NA	NA	NA	NA	NA	NA	NA	NA	NA	NA	NA	NA	NA	NA	NA	NA	3
Positive	No	0	52143	21453	24351	43215	13425	1	NA	NA	NA	NA	NA	1	0	0	0	0	1	1	1	2	1	1	1	1	2	1	1	0	0	0	0	1	0	0	1	0	0	0	1	1	0	0	0	0	1	0	3
Positive	No	1	23415	23415	21345	23145	23145	0	0	3	2	1	1	NA	NA	NA	NA	NA	NA	NA	NA	NA	NA	0	3	2	1	1	NA	NA	NA	NA	NA	NA	NA	NA	NA	NA	NA	NA	NA	NA	NA	NA	NA	NA	NA	NA	4
Negative	No	0	12345	12345	23415	23145	12345	1	NA	NA	NA	NA	NA	1	1	1	0	0	1	2	1	2	1	1	2	1	2	1	1	0	0	0	1	0	0	1	1	0	0	0	1	1	0	0	0	1	0	0	1
Positive	No	1	12345	21345	23415	21345	21345	0	1	2	2	2	1	NA	NA	NA	NA	NA	NA	NA	NA	NA	NA	1	2	2	2	1	NA	NA	NA	NA	NA	NA	NA	NA	NA	NA	NA	NA	NA	NA	NA	NA	NA	NA	NA	NA	1
Positive	Yes	0	23415	21345	21345	23451	23145	1	NA	NA	NA	NA	NA	1	0	0	0	0	0	2	2	1	1	0	2	2	1	1	0	0	0	0	0	1	0	1	1	0	1	0	1	0	0	0	0	1	0	0	4
Negative	No	0	23415	23451	23415	23145	23145	1	NA	NA	NA	NA	NA	1	0	1	0	0	0	0	2	1	2	0	0	2	1	2	0	0	0	0	0	0	0	0	1	0	0	1	1	0	0	0	0	0	1	1	4
Positive	Yes	0	23145	23451	21345	21345	12345	1	NA	NA	NA	NA	NA	1	1	0	0	0	0	2	2	1	1	0	2	2	1	1	0	0	0	0	0	1	0	1	1	1	0	0	1	0	0	0	0	0	0	1	3
Negative	No	0	21345	23451	23415	23415	23415	1	NA	NA	NA	NA	NA	1	0	1	0	0	0	2	2	1	2	0	2	2	1	2	0	0	0	0	0	1	0	1	1	0	1	0	1	0	0	0	0	1	1	0	2
Positive	Yes	1	23451	23145	23415	12345	21345	0	2	2	3	2	0	NA	NA	NA	NA	NA	NA	NA	NA	NA	NA	2	2	3	2	0	NA	NA	NA	NA	NA	NA	NA	NA	NA	NA	NA	NA	NA	NA	NA	NA	NA	NA	NA	NA	5
Unknown	No	1	23415	23451	23415	23415	23451	0	1	0	3	1	1	NA	NA	NA	NA	NA	NA	NA	NA	NA	NA	1	0	3	1	1	NA	NA	NA	NA	NA	NA	NA	NA	NA	NA	NA	NA	NA	NA	NA	NA	NA	NA	NA	NA	4
Negative	No	0	23145	12345	23145	23145	23451	1	NA	NA	NA	NA	NA	1	1	1	0	0	0	2	2	3	1	0	2	2	3	1	0	0	0	0	0	1	0	1	1	0	1	0	1	1	1	0	0	0	1	0	3
Positive	Yes	0	12345	21345	23451	12345	23451	1	NA	NA	NA	NA	NA	1	0	1	0	0	0	0	2	2	3	0	0	2	2	3	0	0	0	0	0	0	0	0	1	0	1	0	1	1	0	0	0	1	1	1	1
Positive	Yes	0	21345	12345	23145	23415	23415	1	NA	NA	NA	NA	NA	1	0	0	0	0	1	1	2	3	1	1	1	2	3	1	0	0	0	1	0	0	0	1	1	0	0	1	1	1	1	0	0	0	1	0	2
Positive	Yes	0	23451	21345	23415	23145	21345	1	NA	NA	NA	NA	NA	1	1	0	0	0	0	1	2	1	1	0	1	2	1	1	0	0	0	0	0	0	0	1	1	0	1	0	1	0	0	0	0	0	0	1	5
Negative	No	1	21345	23451	23415	23451	23415	0	1	1	3	1	1	NA	NA	NA	NA	NA	NA	NA	NA	NA	NA	1	1	3	1	1	NA	NA	NA	NA	NA	NA	NA	NA	NA	NA	NA	NA	NA	NA	NA	NA	NA	NA	NA	NA	2
Positive	Yes	1	21345	23451	23415	21345	23415	0	1	1	2	2	2	NA	NA	NA	NA	NA	NA	NA	NA	NA	NA	1	1	2	2	2	NA	NA	NA	NA	NA	NA	NA	NA	NA	NA	NA	NA	NA	NA	NA	NA	NA	NA	NA	NA	2
Negative	No	1	23145	23451	23451	23415	23415	0	0	1	4	2	1	NA	NA	NA	NA	NA	NA	NA	NA	NA	NA	0	1	4	2	1	NA	NA	NA	NA	NA	NA	NA	NA	NA	NA	NA	NA	NA	NA	NA	NA	NA	NA	NA	NA	3
Negative	No	1	12345	12345	23145	23451	12345	0	1	1	3	3	0	NA	NA	NA	NA	NA	NA	NA	NA	NA	NA	1	1	3	3	0	NA	NA	NA	NA	NA	NA	NA	NA	NA	NA	NA	NA	NA	NA	NA	NA	NA	NA	NA	NA	1
Unknown	No	0	12345	21345	21345	23145	23145	1	NA	NA	NA	NA	NA	1	0	1	0	0	1	0	1	2	1	1	0	1	2	1	1	0	0	0	0	0	0	0	1	0	0	0	1	1	0	0	0	0	1	0	1
Positive	No	0	52143	31425	52431	31542	13254	1	NA	NA	NA	NA	NA	0	1	1	0	0	0	1	2	2	3	0	1	2	2	3	0	0	0	0	0	0	0	1	1	0	1	0	1	1	0	0	0	1	1	1	3
Unknown	No	0	23145	23415	23145	12345	12345	1	NA	NA	NA	NA	NA	1	0	1	0	1	0	0	2	3	2	0	0	2	3	2	0	0	0	0	0	0	0	0	1	0	0	1	1	1	1	0	0	1	1	0	3
Positive	Yes	0	12543	14532	21354	43521	42351	1	NA	NA	NA	NA	NA	0	0	0	0	0	0	0	1	2	0	0	0	1	2	0	0	0	0	0	0	0	0	0	1	0	0	0	1	1	0	0	0	0	0	0	1
Positive	No	1	54123	12534	14253	34251	14523	0	1	1	2	1	2	NA	NA	NA	NA	NA	NA	NA	NA	NA	NA	1	1	2	1	2	NA	NA	NA	NA	NA	NA	NA	NA	NA	NA	NA	NA	NA	NA	NA	NA	NA	NA	NA	NA	3
Positive	Yes	1	25413	25413	41253	21354	51234	0	1	1	2	1	1	NA	NA	NA	NA	NA	NA	NA	NA	NA	NA	1	1	2	1	1	NA	NA	NA	NA	NA	NA	NA	NA	NA	NA	NA	NA	NA	NA	NA	NA	NA	NA	NA	NA	4
Positive	No	1	21345	23145	23415	23415	23145	0	2	2	3	2	2	NA	NA	NA	NA	NA	NA	NA	NA	NA	NA	2	2	3	2	2	NA	NA	NA	NA	NA	NA	NA	NA	NA	NA	NA	NA	NA	NA	NA	NA	NA	NA	NA	NA	2
Positive	No	1	23451	23451	12345	21345	21345	0	0	2	3	2	0	NA	NA	NA	NA	NA	NA	NA	NA	NA	NA	0	2	3	2	0	NA	NA	NA	NA	NA	NA	NA	NA	NA	NA	NA	NA	NA	NA	NA	NA	NA	NA	NA	NA	5
Negative	No	1	23415	23145	23451	23415	23415	0	1	1	3	2	1	NA	NA	NA	NA	NA	NA	NA	NA	NA	NA	1	1	3	2	1	NA	NA	NA	NA	NA	NA	NA	NA	NA	NA	NA	NA	NA	NA	NA	NA	NA	NA	NA	NA	4
Positive	Yes	1	25431	21345	23451	51432	21354	0	3	2	3	3	2	NA	NA	NA	NA	NA	NA	NA	NA	NA	NA	3	2	3	3	2	NA	NA	NA	NA	NA	NA	NA	NA	NA	NA	NA	NA	NA	NA	NA	NA	NA	NA	NA	NA	5
Positive	No	1	12345	23415	23415	12345	23415	0	1	1	3	3	3	NA	NA	NA	NA	NA	NA	NA	NA	NA	NA	1	1	3	3	3	NA	NA	NA	NA	NA	NA	NA	NA	NA	NA	NA	NA	NA	NA	NA	NA	NA	NA	NA	NA	1
Positive	Yes	0	23451	12345	12345	23451	23451	1	NA	NA	NA	NA	NA	1	0	1	0	0	1	1	2	2	2	1	1	2	2	2	0	0	0	1	0	0	0	1	1	0	1	0	1	1	0	0	0	1	1	0	5
Positive	Yes	1	12345	23415	23145	23145	23415	0	2	2	3	4	3	NA	NA	NA	NA	NA	NA	NA	NA	NA	NA	2	2	3	4	3	NA	NA	NA	NA	NA	NA	NA	NA	NA	NA	NA	NA	NA	NA	NA	NA	NA	NA	NA	NA	1
Positive	Yes	0	12345	23415	21345	23415	12345	1	NA	NA	NA	NA	NA	1	1	0	0	1	1	0	1	1	1	1	0	1	1	1	0	0	0	1	0	0	0	0	1	0	0	0	1	0	0	0	0	0	1	0	1
Positive	No	0	41523	23415	23145	12354	14253	1	NA	NA	NA	NA	NA	0	1	0	0	0	0	1	2	2	1	0	1	2	2	1	0	0	0	0	0	0	0	1	1	1	0	0	1	1	0	0	0	0	1	0	2
Positive	Yes	0	23145	21345	23451	23415	21345	1	NA	NA	NA	NA	NA	1	0	NA	0	0	0	1	1	3	0	0	1	1	3	0	0	0	0	0	0	1	0	0	1	0	0	0	1	1	0	1	0	0	0	0	3
Positive	No	1	12345	21345	12345	23415	21345	0	1	3	2	2	3	NA	NA	NA	NA	NA	NA	NA	NA	NA	NA	1	3	2	2	3	NA	NA	NA	NA	NA	NA	NA	NA	NA	NA	NA	NA	NA	NA	NA	NA	NA	NA	NA	NA	1
Negative	No	1	23415	12345	23145	23145	12345	0	1	1	2	1	2	NA	NA	NA	NA	NA	NA	NA	NA	NA	NA	1	1	2	1	2	NA	NA	NA	NA	NA	NA	NA	NA	NA	NA	NA	NA	NA	NA	NA	NA	NA	NA	NA	NA	4
Unknown	No	1	23415	12345	23145	23145	23145	0	1	1	0	2	2	NA	NA	NA	NA	NA	NA	NA	NA	NA	NA	1	1	0	2	2	NA	NA	NA	NA	NA	NA	NA	NA	NA	NA	NA	NA	NA	NA	NA	NA	NA	NA	NA	NA	4
Positive	Yes	1	23451	23145	12345	23451	23415	0	1	3	NA	3	3	NA	NA	NA	NA	NA	NA	NA	NA	NA	NA	1	3	NA	3	3	NA	NA	NA	NA	NA	NA	NA	NA	NA	NA	NA	NA	NA	NA	NA	NA	NA	NA	NA	NA	5
Negative	No	0	21345	23145	12345	23451	12345	1	NA	NA	NA	NA	NA	1	1	1	0	0	1	1	1	2	1	1	1	1	2	1	0	0	0	1	0	1	0	0	1	0	0	0	1	1	0	0	0	0	1	0	2
Negative	No	1	23451	21345	23415	21345	21345	0	1	2	2	2	1	NA	NA	NA	NA	NA	NA	NA	NA	NA	NA	1	2	2	2	1	NA	NA	NA	NA	NA	NA	NA	NA	NA	NA	NA	NA	NA	NA	NA	NA	NA	NA	NA	NA	5
Positive	No	0	23145	12345	23415	12345	21345	1	NA	NA	NA	NA	NA	1	1	0	0	0	0	1	1	2	1	0	1	1	2	1	0	0	0	0	0	0	0	1	1	0	0	0	1	1	0	0	0	0	1	0	3
Positive	No	0	21345	23451	12345	23415	23451	1	NA	NA	NA	NA	NA	1	1	1	0	0	0	2	2	3	3	0	2	2	3	3	0	0	0	0	1	0	0	1	1	1	0	0	1	1	0	1	0	1	1	1	2
Positive	No	1	34251	14253	15432	54123	15234	0	2	3	4	5	2	NA	NA	NA	NA	NA	NA	NA	NA	NA	NA	2	3	4	5	2	NA	NA	NA	NA	NA	NA	NA	NA	NA	NA	NA	NA	NA	NA	NA	NA	NA	NA	NA	NA	5
Negative	No	0	23451	23415	23415	23451	23451	1	NA	NA	NA	NA	NA	1	0	1	0	0	0	0	1	1	1	0	0	1	1	1	0	0	0	0	0	0	0	0	0	0	1	0	1	0	0	0	0	0	0	1	5
Positive	No	0	21345	23451	21345	23145	23415	1	NA	NA	NA	NA	NA	1	0	1	0	0	0	0	0	1	0	0	0	0	1	0	0	0	0	0	0	0	0	0	0	0	0	0	1	0	0	0	0	0	0	0	2
Positive	No	1	21345	12345	23415	12345	23415	0	1	3	4	3	2	NA	NA	NA	NA	NA	NA	NA	NA	NA	NA	1	3	4	3	2	NA	NA	NA	NA	NA	NA	NA	NA	NA	NA	NA	NA	NA	NA	NA	NA	NA	NA	NA	NA	2
Positive	No	1	23145	23451	12345	12345	23415	0	0	1	2	3	2	NA	NA	NA	NA	NA	NA	NA	NA	NA	NA	0	1	2	3	2	NA	NA	NA	NA	NA	NA	NA	NA	NA	NA	NA	NA	NA	NA	NA	NA	NA	NA	NA	NA	3
Positive	Yes	0	23145	23415	23145	23451	12345	1	NA	NA	NA	NA	NA	1	1	0	0	1	0	0	1	2	1	0	0	1	2	1	0	0	0	0	0	0	0	0	1	0	0	0	1	1	0	0	0	1	0	0	3
Positive	Yes	1	23451	12345	23145	23145	23451	0	0	2	4	2	2	NA	NA	NA	NA	NA	NA	NA	NA	NA	NA	0	2	4	2	2	NA	NA	NA	NA	NA	NA	NA	NA	NA	NA	NA	NA	NA	NA	NA	NA	NA	NA	NA	NA	5
Negative	No	1	23415	12345	12345	21345	12345	0	0	3	4	2	1	NA	NA	NA	NA	NA	NA	NA	NA	NA	NA	0	3	4	2	1	NA	NA	NA	NA	NA	NA	NA	NA	NA	NA	NA	NA	NA	NA	NA	NA	NA	NA	NA	NA	4
Unknown	No	0	23145	21345	23451	12345	12345	1	NA	NA	NA	NA	NA	1	1	1	0	0	0	1	2	2	2	0	1	2	2	2	0	0	0	0	0	0	0	1	1	0	1	0	1	1	0	0	0	1	1	0	3
Negative	No	1	23145	21345	21345	12345	23451	0	1	0	2	1	1	NA	NA	NA	NA	NA	NA	NA	NA	NA	NA	1	0	2	1	1	NA	NA	NA	NA	NA	NA	NA	NA	NA	NA	NA	NA	NA	NA	NA	NA	NA	NA	NA	NA	3
Positive	Yes	1	23415	21345	23415	23415	23415	0	3	0	0	1	3	NA	NA	NA	NA	NA	NA	NA	NA	NA	NA	3	0	0	1	3	NA	NA	NA	NA	NA	NA	NA	NA	NA	NA	NA	NA	NA	NA	NA	NA	NA	NA	NA	NA	4
Positive	Yes	1	23415	23451	23145	23415	12345	0	3	2	1	3	1	NA	NA	NA	NA	NA	NA	NA	NA	NA	NA	3	2	1	3	1	NA	NA	NA	NA	NA	NA	NA	NA	NA	NA	NA	NA	NA	NA	NA	NA	NA	NA	NA	NA	4
Positive	Yes	1	21345	23145	23451	12345	23415	0	1	1	2	1	1	NA	NA	NA	NA	NA	NA	NA	NA	NA	NA	1	1	2	1	1	NA	NA	NA	NA	NA	NA	NA	NA	NA	NA	NA	NA	NA	NA	NA	NA	NA	NA	NA	NA	2
Positive	No	1	21345	12345	21345	12345	23451	0	1	2	2	1	1	NA	NA	NA	NA	NA	NA	NA	NA	NA	NA	1	2	2	1	1	NA	NA	NA	NA	NA	NA	NA	NA	NA	NA	NA	NA	NA	NA	NA	NA	NA	NA	NA	NA	2
Negative	No	1	21345	23451	12345	12345	21345	0	3	1	2	1	2	NA	NA	NA	NA	NA	NA	NA	NA	NA	NA	3	1	2	1	2	NA	NA	NA	NA	NA	NA	NA	NA	NA	NA	NA	NA	NA	NA	NA	NA	NA	NA	NA	NA	2
Positive	Yes	1	12345	23145	23451	12345	12345	0	0	2	3	3	2	NA	NA	NA	NA	NA	NA	NA	NA	NA	NA	0	2	3	3	2	NA	NA	NA	NA	NA	NA	NA	NA	NA	NA	NA	NA	NA	NA	NA	NA	NA	NA	NA	NA	1
Positive	Yes	0	23145	23145	21345	21345	12345	1	NA	NA	NA	NA	NA	1	1	0	0	0	0	1	2	2	0	0	1	2	2	0	0	0	0	0	0	0	0	1	1	0	1	0	1	1	0	0	0	0	0	0	3
Negative	No	0	12345	23145	23451	23145	12345	1	NA	NA	NA	NA	NA	1	0	1	0	0	0	1	3	2	2	0	1	3	2	2	0	0	0	0	0	0	0	1	1	1	1	0	1	1	0	0	0	1	0	1	1
Negative	No	1	23415	15342	45123	52134	54231	0	1	2	NA	1	1	NA	NA	NA	NA	NA	NA	NA	NA	NA	NA	1	2	NA	1	1	NA	NA	NA	NA	NA	NA	NA	NA	NA	NA	NA	NA	NA	NA	NA	NA	NA	NA	NA	NA	4
Positive	Yes	1	52413	41523	45231	52341	21354	0	1	0	3	4	5	NA	NA	NA	NA	NA	NA	NA	NA	NA	NA	1	0	3	4	5	NA	NA	NA	NA	NA	NA	NA	NA	NA	NA	NA	NA	NA	NA	NA	NA	NA	NA	NA	NA	4
Positive	No	0	24531	24153	23415	52314	13254	1	NA	NA	NA	NA	NA	0	0	0	1	0	1	3	2	2	1	1	3	2	2	1	0	0	0	1	1	0	1	1	1	0	1	0	1	1	0	0	0	1	0	0	5
Positive	No	1	23145	21345	12345	23415	23145	0	1	3	0	1	3	NA	NA	NA	NA	NA	NA	NA	NA	NA	NA	1	3	0	1	3	NA	NA	NA	NA	NA	NA	NA	NA	NA	NA	NA	NA	NA	NA	NA	NA	NA	NA	NA	NA	3
Positive	Yes	0	12345	23415	23451	12345	23145	1	NA	NA	NA	NA	NA	1	0	0	0	0	0	1	2	2	0	0	1	2	2	0	0	0	0	0	0	1	0	0	1	0	1	0	1	1	0	0	0	0	0	0	1
Negative	No	0	12345	12345	23415	12345	12345	1	NA	NA	NA	NA	NA	1	1	1	0	0	0	1	1	2	1	0	1	1	2	1	0	0	0	0	0	0	0	1	1	0	0	0	1	1	0	0	0	0	1	0	1
Positive	No	0	23451	23415	23451	23145	23451	1	NA	NA	NA	NA	NA	1	1	0	0	0	2	1	1	2	0	2	1	1	2	0	1	0	0	1	0	0	0	1	1	0	0	0	1	1	0	0	0	0	0	0	5
Negative	No	0	23145	23145	23451	23451	23145	1	NA	NA	NA	NA	NA	1	0	1	0	0	1	0	1	2	0	1	0	1	2	0	1	0	0	0	0	0	0	0	1	0	0	0	1	0	1	0	0	0	0	0	3
Positive	No	0	21345	21345	23415	23145	12345	1	NA	NA	NA	NA	NA	1	1	1	0	0	0	0	1	2	1	0	0	1	2	1	0	0	0	0	0	0	0	0	1	0	0	0	1	1	0	0	0	0	1	0	2
Positive	Yes	1	23415	23415	23145	23451	23145	0	1	2	2	2	0	NA	NA	NA	NA	NA	NA	NA	NA	NA	NA	1	2	2	2	0	NA	NA	NA	NA	NA	NA	NA	NA	NA	NA	NA	NA	NA	NA	NA	NA	NA	NA	NA	NA	4
Positive	Yes	1	21345	21345	23415	23145	23451	0	1	2	2	2	1	NA	NA	NA	NA	NA	NA	NA	NA	NA	NA	1	2	2	2	1	NA	NA	NA	NA	NA	NA	NA	NA	NA	NA	NA	NA	NA	NA	NA	NA	NA	NA	NA	NA	2
Positive	No	1	12345	23415	12345	23145	12345	0	0	2	3	2	1	NA	NA	NA	NA	NA	NA	NA	NA	NA	NA	0	2	3	2	1	NA	NA	NA	NA	NA	NA	NA	NA	NA	NA	NA	NA	NA	NA	NA	NA	NA	NA	NA	NA	1
Positive	Yes	0	21345	21345	12345	23415	23415	1	NA	NA	NA	NA	NA	1	1	0	0	0	0	1	2	2	1	0	1	2	2	1	0	0	0	0	0	1	0	0	1	0	1	0	1	1	0	0	0	0	1	0	2
Positive	No	1	12345	23415	23451	21345	23145	0	0	1	1	2	0	NA	NA	NA	NA	NA	NA	NA	NA	NA	NA	0	1	1	2	0	NA	NA	NA	NA	NA	NA	NA	NA	NA	NA	NA	NA	NA	NA	NA	NA	NA	NA	NA	NA	1
Negative	No	0	52314	21354	42135	52413	24351	1	NA	NA	NA	NA	NA	1	0	1	0	0	0	1	2	3	1	0	1	2	3	1	0	0	0	0	0	0	0	1	1	0	1	0	1	1	0	1	0	1	0	0	4
Negative	No	0	51342	23154	12435	35214	53142	1	NA	NA	NA	NA	NA	1	0	0	0	0	NA	NA	NA	4	NA	NA	NA	NA	4	NA	NA	NA	NA	NA	NA	1	NA	1	1	NA	NA	NA	1	1	1	1	1	0	NA	NA	2
Unknown	No	0	25341	52431	13452	52413	42531	1	NA	NA	NA	NA	NA	1	1	1	0	1	0	1	1	2	1	0	1	1	2	1	0	0	0	0	1	0	0	0	1	0	0	0	1	1	0	0	0	0	1	0	5
Positive	Yes	0	23145	23145	23415	23415	23415	1	NA	NA	NA	NA	NA	1	1	0	0	0	0	0	2	2	1	0	0	2	2	1	0	0	0	0	0	0	0	0	1	0	1	0	1	1	0	0	0	0	1	0	3
Negative	No	1	23451	23415	23451	23451	12345	0	2	1	2	2	0	NA	NA	NA	NA	NA	NA	NA	NA	NA	NA	2	1	2	2	0	NA	NA	NA	NA	NA	NA	NA	NA	NA	NA	NA	NA	NA	NA	NA	NA	NA	NA	NA	NA	5
Unknown	No	0	23415	23451	23451	21345	23451	1	NA	NA	NA	NA	NA	1	0	0	0	0	2	2	2	2	1	2	2	2	2	1	1	0	0	1	0	1	0	1	1	0	1	0	1	1	0	0	0	0	1	0	4
Positive	Yes	0	42315	43152	15423	25314	15234	1	NA	NA	NA	NA	NA	1	0	0	0	0	1	1	2	2	2	1	1	2	2	2	1	0	0	0	0	0	0	1	1	0	1	0	1	1	0	0	0	1	1	0	4
Positive	Yes	0	31245	12543	34521	45132	54123	1	NA	NA	NA	NA	NA	1	1	0	0	0	2	0	3	2	1	2	0	3	2	1	1	0	0	1	0	0	0	0	1	1	1	0	1	1	0	0	0	1	0	0	2
Positive	Yes	1	12345	12345	23415	23451	23145	0	1	2	1	2	1	NA	NA	NA	NA	NA	NA	NA	NA	NA	NA	1	2	1	2	1	NA	NA	NA	NA	NA	NA	NA	NA	NA	NA	NA	NA	NA	NA	NA	NA	NA	NA	NA	NA	1
Positive	Yes	1	23451	21345	23145	21345	21345	0	1	2	1	2	2	NA	NA	NA	NA	NA	NA	NA	NA	NA	NA	1	2	1	2	2	NA	NA	NA	NA	NA	NA	NA	NA	NA	NA	NA	NA	NA	NA	NA	NA	NA	NA	NA	NA	5
Positive	No	1	12345	23451	23451	21345	23451	0	1	2	3	3	2	NA	NA	NA	NA	NA	NA	NA	NA	NA	NA	1	2	3	3	2	NA	NA	NA	NA	NA	NA	NA	NA	NA	NA	NA	NA	NA	NA	NA	NA	NA	NA	NA	NA	1
Negative	No	0	12345	21345	12345	12345	23145	1	NA	NA	NA	NA	NA	1	0	1	0	0	0	0	2	2	1	0	0	2	2	1	0	0	0	0	0	0	0	0	1	0	0	1	1	1	0	0	0	0	1	0	1
Negative	No	1	23415	23415	21345	23451	21345	0	1	2	3	3	2	NA	NA	NA	NA	NA	NA	NA	NA	NA	NA	1	2	3	3	2	NA	NA	NA	NA	NA	NA	NA	NA	NA	NA	NA	NA	NA	NA	NA	NA	NA	NA	NA	NA	4
Positive	Yes	0	34512	41235	32514	35214	24351	1	NA	NA	NA	NA	NA	0	1	0	0	1	0	1	2	2	1	0	1	2	2	1	0	0	0	0	0	0	0	1	1	0	0	1	1	1	0	0	0	0	1	0	4
Positive	Yes	0	23451	23415	12345	23145	12345	1	NA	NA	NA	NA	NA	1	0	0	0	0	0	3	2	1	3	0	3	2	1	3	0	0	0	0	1	1	0	1	1	0	0	1	1	0	0	0	1	0	1	1	5
Negative	No	0	14532	51432	31542	15342	35142	1	NA	NA	NA	NA	NA	0	NA	1	0	0	0	2	1	2	0	0	2	1	2	0	0	0	0	0	0	1	0	1	1	0	0	0	1	1	0	0	0	0	0	0	1
Negative	No	1	31524	54132	41325	34512	52134	0	1	1	3	2	1	NA	NA	NA	NA	NA	NA	NA	NA	NA	NA	1	1	3	2	1	NA	NA	NA	NA	NA	NA	NA	NA	NA	NA	NA	NA	NA	NA	NA	NA	NA	NA	NA	NA	2
Negative	No	0	45213	13254	12345	13425	53412	1	NA	NA	NA	NA	NA	1	0	1	0	0	1	1	1	1	0	1	1	1	1	0	1	0	0	0	0	1	0	0	1	0	0	0	1	0	0	0	0	0	0	0	4
Positive	No	1	25413	53412	15324	23145	15423	0	0	1	2	3	1	NA	NA	NA	NA	NA	NA	NA	NA	NA	NA	0	1	2	3	1	NA	NA	NA	NA	NA	NA	NA	NA	NA	NA	NA	NA	NA	NA	NA	NA	NA	NA	NA	NA	4
Unknown	No	1	23451	23415	12345	21345	23451	0	1	2	1	1	3	NA	NA	NA	NA	NA	NA	NA	NA	NA	NA	1	2	1	1	3	NA	NA	NA	NA	NA	NA	NA	NA	NA	NA	NA	NA	NA	NA	NA	NA	NA	NA	NA	NA	5
Negative	No	0	23415	23415	23451	23145	21345	1	NA	NA	NA	NA	NA	1	0	1	0	0	0	0	2	3	3	0	0	2	3	3	0	0	0	0	0	0	0	0	1	0	1	0	1	1	1	0	1	1	1	0	4
Positive	No	1	23145	23451	23415	23415	12345	0	1	1	0	2	0	NA	NA	NA	NA	NA	NA	NA	NA	NA	NA	1	1	0	2	0	NA	NA	NA	NA	NA	NA	NA	NA	NA	NA	NA	NA	NA	NA	NA	NA	NA	NA	NA	NA	3
Negative	No	0	12534	34512	54321	54132	51342	1	NA	NA	NA	NA	NA	1	0	1	0	0	1	1	3	1	2	1	1	3	1	2	0	0	0	1	0	0	0	1	1	0	1	1	1	0	0	0	0	1	1	0	1
Positive	No	1	32145	32415	14325	45231	42531	0	1	2	2	2	2	NA	NA	NA	NA	NA	NA	NA	NA	NA	NA	1	2	2	2	2	NA	NA	NA	NA	NA	NA	NA	NA	NA	NA	NA	NA	NA	NA	NA	NA	NA	NA	NA	NA	3
Unknown	No	1	23145	23451	12345	21345	23451	0	1	1	1	2	1	NA	NA	NA	NA	NA	NA	NA	NA	NA	NA	1	1	1	2	1	NA	NA	NA	NA	NA	NA	NA	NA	NA	NA	NA	NA	NA	NA	NA	NA	NA	NA	NA	NA	3
Positive	No	0	23145	23451	23145	23451	23415	1	NA	NA	NA	NA	NA	1	0	0	0	0	0	0	1	1	1	0	0	1	1	1	0	0	0	0	0	0	0	0	1	0	0	0	1	0	0	0	0	0	1	0	3
Positive	Yes	1	23451	23145	21345	12345	23415	0	3	2	3	1	2	NA	NA	NA	NA	NA	NA	NA	NA	NA	NA	3	2	3	1	2	NA	NA	NA	NA	NA	NA	NA	NA	NA	NA	NA	NA	NA	NA	NA	NA	NA	NA	NA	NA	5
Negative	No	0	12345	12345	23415	23145	12345	1	NA	NA	NA	NA	NA	1	0	1	0	0	1	1	2	2	1	1	1	2	2	1	0	0	0	1	0	1	0	0	1	0	0	1	1	1	0	0	0	0	0	1	1
Positive	No	1	23451	23415	23415	23415	23145	0	1	2	1	2	0	NA	NA	NA	NA	NA	NA	NA	NA	NA	NA	1	2	1	2	0	NA	NA	NA	NA	NA	NA	NA	NA	NA	NA	NA	NA	NA	NA	NA	NA	NA	NA	NA	NA	5
Negative	No	1	21345	23145	23451	23415	23415	0	1	2	2	0	2	NA	NA	NA	NA	NA	NA	NA	NA	NA	NA	1	2	2	0	2	NA	NA	NA	NA	NA	NA	NA	NA	NA	NA	NA	NA	NA	NA	NA	NA	NA	NA	NA	NA	2
Positive	Yes	1	12345	23451	12345	23451	23451	0	1	2	3	2	1	NA	NA	NA	NA	NA	NA	NA	NA	NA	NA	1	2	3	2	1	NA	NA	NA	NA	NA	NA	NA	NA	NA	NA	NA	NA	NA	NA	NA	NA	NA	NA	NA	NA	1
Negative	No	0	23451	23145	23415	23145	23145	1	NA	NA	NA	NA	NA	1	1	1	NA	0	0	1	1	2	1	0	1	1	2	1	0	0	0	0	0	0	0	1	1	0	0	0	1	1	0	0	0	1	0	0	5
Positive	Yes	1	21345	23451	23145	23145	12345	0	0	1	3	1	2	NA	NA	NA	NA	NA	NA	NA	NA	NA	NA	0	1	3	1	2	NA	NA	NA	NA	NA	NA	NA	NA	NA	NA	NA	NA	NA	NA	NA	NA	NA	NA	NA	NA	2
Negative	No	0	23145	23415	23415	23415	23451	1	NA	NA	NA	NA	NA	1	0	1	0	0	0	1	2	1	1	0	1	2	1	1	0	0	0	0	0	0	0	1	1	0	0	1	1	0	0	0	0	0	1	0	3
Negative	No	1	23415	23451	12345	12345	23415	0	1	1	1	2	2	NA	NA	NA	NA	NA	NA	NA	NA	NA	NA	1	1	1	2	2	NA	NA	NA	NA	NA	NA	NA	NA	NA	NA	NA	NA	NA	NA	NA	NA	NA	NA	NA	NA	4
Positive	Yes	0	52143	21345	35241	15432	42315	1	NA	NA	NA	NA	NA	1	1	0	0	0	1	1	2	2	0	1	1	2	2	0	1	0	0	0	0	0	0	1	1	0	1	0	1	1	0	0	0	0	0	0	3
Positive	No	1	23451	23145	23451	21345	23451	0	2	3	3	1	2	NA	NA	NA	NA	NA	NA	NA	NA	NA	NA	2	3	3	1	2	NA	NA	NA	NA	NA	NA	NA	NA	NA	NA	NA	NA	NA	NA	NA	NA	NA	NA	NA	NA	5
Positive	No	1	23415	23145	23145	23415	12345	0	1	1	2	1	3	NA	NA	NA	NA	NA	NA	NA	NA	NA	NA	1	1	2	1	3	NA	NA	NA	NA	NA	NA	NA	NA	NA	NA	NA	NA	NA	NA	NA	NA	NA	NA	NA	NA	4
Unknown	No	0	23145	21345	23451	23145	23451	1	NA	NA	NA	NA	NA	0	1	1	0	0	0	1	1	2	0	0	1	1	2	0	0	0	0	0	0	0	0	1	1	0	0	0	1	1	0	0	0	0	0	0	3
Positive	Yes	0	12345	12345	23415	23451	23145	1	NA	NA	NA	NA	NA	1	1	NA	0	0	0	1	1	2	2	0	1	1	2	2	0	0	0	0	0	0	0	1	0	0	1	0	1	1	0	0	1	0	1	0	1
Negative	No	1	21345	23415	23415	23145	23145	0	0	1	1	2	1	NA	NA	NA	NA	NA	NA	NA	NA	NA	NA	0	1	1	2	1	NA	NA	NA	NA	NA	NA	NA	NA	NA	NA	NA	NA	NA	NA	NA	NA	NA	NA	NA	NA	2
Negative	No	1	21345	21345	23415	12345	23145	0	2	2	1	4	3	NA	NA	NA	NA	NA	NA	NA	NA	NA	NA	2	2	1	4	3	NA	NA	NA	NA	NA	NA	NA	NA	NA	NA	NA	NA	NA	NA	NA	NA	NA	NA	NA	NA	2
Unknown	No	0	12345	23145	23415	23415	23145	1	NA	NA	NA	NA	NA	1	0	1	0	1	0	1	2	3	1	0	1	2	3	1	0	0	0	0	0	0	0	1	1	0	1	0	1	1	1	0	0	0	1	0	1
Unknown	No	1	23145	12345	23415	21345	12345	0	1	2	3	3	3	NA	NA	NA	NA	NA	NA	NA	NA	NA	NA	1	2	3	3	3	NA	NA	NA	NA	NA	NA	NA	NA	NA	NA	NA	NA	NA	NA	NA	NA	NA	NA	NA	NA	3
Unknown	No	0	12345	23451	21345	23451	23451	1	NA	NA	NA	NA	NA	0	1	1	0	1	1	1	1	2	1	1	1	1	2	1	1	0	0	0	0	1	0	0	1	0	0	0	1	1	0	0	0	0	1	0	1
Positive	Yes	0	12345	23415	23451	12345	23451	1	NA	NA	NA	NA	NA	1	1	0	0	0	0	1	2	2	0	0	1	2	2	0	0	0	0	0	0	0	0	1	1	0	1	0	1	1	0	0	0	0	0	0	1
Positive	Yes	1	31542	13245	14235	42315	45312	0	2	2	3	3	3	NA	NA	NA	NA	NA	NA	NA	NA	NA	NA	2	2	3	3	3	NA	NA	NA	NA	NA	NA	NA	NA	NA	NA	NA	NA	NA	NA	NA	NA	NA	NA	NA	NA	2
Negative	No	0	23415	23415	12345	23415	23415	1	NA	NA	NA	NA	NA	1	0	1	0	0	1	2	3	1	3	1	2	3	1	3	0	0	0	1	1	0	0	1	1	0	1	1	1	0	0	0	1	1	1	0	4
Positive	No	0	23415	12543	24315	31245	21354	1	NA	NA	NA	NA	NA	1	1	1	0	0	0	3	1	1	1	0	3	1	1	1	0	0	0	0	1	1	0	1	1	0	0	0	1	0	0	0	0	0	1	0	4
Positive	Yes	1	23451	12345	12345	12345	21345	0	0	2	1	1	2	NA	NA	NA	NA	NA	NA	NA	NA	NA	NA	0	2	1	1	2	NA	NA	NA	NA	NA	NA	NA	NA	NA	NA	NA	NA	NA	NA	NA	NA	NA	NA	NA	NA	5
Positive	Yes	1	12345	23145	21345	12345	12345	0	2	0	2	3	1	NA	NA	NA	NA	NA	NA	NA	NA	NA	NA	2	0	2	3	1	NA	NA	NA	NA	NA	NA	NA	NA	NA	NA	NA	NA	NA	NA	NA	NA	NA	NA	NA	NA	1
Positive	No	0	21345	21345	21345	21345	12345	1	NA	NA	NA	NA	NA	1	1	1	0	1	0	2	2	2	0	0	2	2	2	0	0	0	0	0	0	1	0	1	1	0	1	0	1	1	0	0	0	0	0	0	2
Positive	Yes	1	23415	21345	23451	23451	23145	0	1	1	2	1	2	NA	NA	NA	NA	NA	NA	NA	NA	NA	NA	1	1	2	1	2	NA	NA	NA	NA	NA	NA	NA	NA	NA	NA	NA	NA	NA	NA	NA	NA	NA	NA	NA	NA	4
Negative	No	1	25413	25143	53142	42135	24135	0	1	2	2	2	3	NA	NA	NA	NA	NA	NA	NA	NA	NA	NA	1	2	2	2	3	NA	NA	NA	NA	NA	NA	NA	NA	NA	NA	NA	NA	NA	NA	NA	NA	NA	NA	NA	NA	4
Negative	No	1	21345	23451	21345	12345	23415	0	1	1	3	2	0	NA	NA	NA	NA	NA	NA	NA	NA	NA	NA	1	1	3	2	0	NA	NA	NA	NA	NA	NA	NA	NA	NA	NA	NA	NA	NA	NA	NA	NA	NA	NA	NA	NA	2
Positive	Yes	0	12345	23415	12345	23415	23451	1	NA	NA	NA	NA	NA	0	1	0	0	0	1	0	1	3	2	1	0	1	3	2	0	0	0	1	0	0	0	0	1	0	0	0	1	0	1	1	0	1	1	0	1
Positive	Yes	0	12345	23451	23145	21345	21345	1	NA	NA	NA	NA	NA	1	0	0	0	0	1	2	2	2	1	1	2	2	2	1	1	0	0	0	0	1	0	1	1	0	1	0	1	1	0	0	0	0	1	0	1
Positive	Yes	1	21345	23415	21345	23451	12345	0	2	2	4	3	4	NA	NA	NA	NA	NA	NA	NA	NA	NA	NA	2	2	4	3	4	NA	NA	NA	NA	NA	NA	NA	NA	NA	NA	NA	NA	NA	NA	NA	NA	NA	NA	NA	NA	2
Positive	No	1	21345	23145	12345	23145	23145	0	0	1	3	3	1	NA	NA	NA	NA	NA	NA	NA	NA	NA	NA	0	1	3	3	1	NA	NA	NA	NA	NA	NA	NA	NA	NA	NA	NA	NA	NA	NA	NA	NA	NA	NA	NA	NA	2
Positive	Yes	0	12345	23415	12345	23451	23415	1	NA	NA	NA	NA	NA	0	1	0	0	0	1	1	1	3	0	1	1	1	3	0	0	0	0	1	0	0	0	1	0	0	1	0	1	1	0	1	0	0	0	0	1
Positive	No	0	23415	12345	21345	23145	21345	1	NA	NA	NA	NA	NA	1	1	0	0	0	1	1	2	2	2	1	1	2	2	2	0	0	0	1	0	1	0	0	1	0	1	0	1	1	0	0	1	1	0	0	4
Positive	No	0	23415	23145	23451	21345	23415	1	NA	NA	NA	NA	NA	0	0	0	0	1	1	1	2	2	2	1	1	2	2	2	0	0	0	1	0	0	0	1	1	0	1	0	1	1	0	0	0	1	1	0	4
Unknown	No	0	23415	12345	21345	21345	23145	1	NA	NA	NA	NA	NA	1	1	1	0	0	1	2	3	2	2	1	2	3	2	2	1	0	0	0	0	1	0	1	1	1	1	0	1	1	0	0	1	1	0	0	4
Positive	Yes	1	12345	21345	23451	23451	21345	0	2	2	3	1	2	NA	NA	NA	NA	NA	NA	NA	NA	NA	NA	2	2	3	1	2	NA	NA	NA	NA	NA	NA	NA	NA	NA	NA	NA	NA	NA	NA	NA	NA	NA	NA	NA	NA	1
Positive	Yes	1	23451	23415	23451	23415	23145	0	2	2	4	3	1	NA	NA	NA	NA	NA	NA	NA	NA	NA	NA	2	2	4	3	1	NA	NA	NA	NA	NA	NA	NA	NA	NA	NA	NA	NA	NA	NA	NA	NA	NA	NA	NA	NA	5
Unknown	No	0	25134	34125	23145	54231	21453	1	NA	NA	NA	NA	NA	1	1	0	0	0	2	3	0	2	0	2	3	0	2	0	1	0	0	1	1	1	0	1	0	0	0	0	1	1	0	0	0	0	0	0	3
Negative	No	1	42135	35412	45213	34521	31254	0	0	1	3	1	0	NA	NA	NA	NA	NA	NA	NA	NA	NA	NA	0	1	3	1	0	NA	NA	NA	NA	NA	NA	NA	NA	NA	NA	NA	NA	NA	NA	NA	NA	NA	NA	NA	NA	3
Negative	No	1	31245	54321	53241	23154	13542	0	1	2	3	3	2	NA	NA	NA	NA	NA	NA	NA	NA	NA	NA	1	2	3	3	2	NA	NA	NA	NA	NA	NA	NA	NA	NA	NA	NA	NA	NA	NA	NA	NA	NA	NA	NA	NA	2
Positive	Yes	0	25341	34521	12534	43521	54123	1	NA	NA	NA	NA	NA	1	1	0	0	0	0	1	2	2	0	0	1	2	2	0	0	0	0	0	0	0	0	1	1	0	1	0	1	1	0	0	0	0	0	0	5
Positive	No	1	21345	23451	12345	23415	23451	0	1	2	2	2	0	NA	NA	NA	NA	NA	NA	NA	NA	NA	NA	1	2	2	2	0	NA	NA	NA	NA	NA	NA	NA	NA	NA	NA	NA	NA	NA	NA	NA	NA	NA	NA	NA	NA	2
Positive	No	1	12345	23451	12345	23415	23451	0	1	2	2	1	0	NA	NA	NA	NA	NA	NA	NA	NA	NA	NA	1	2	2	1	0	NA	NA	NA	NA	NA	NA	NA	NA	NA	NA	NA	NA	NA	NA	NA	NA	NA	NA	NA	NA	1
Positive	No	0	15243	52314	53421	45132	21345	1	NA	NA	NA	NA	NA	1	0	0	0	1	0	2	1	2	1	0	2	1	2	1	0	0	0	0	0	1	0	1	1	0	0	0	1	1	0	0	0	0	1	0	1
Positive	Yes	1	23451	21345	12345	12345	12345	0	1	3	2	3	3	NA	NA	NA	NA	NA	NA	NA	NA	NA	NA	1	3	2	3	3	NA	NA	NA	NA	NA	NA	NA	NA	NA	NA	NA	NA	NA	NA	NA	NA	NA	NA	NA	NA	5
Negative	No	0	12345	23451	23145	23451	23451	1	NA	NA	NA	NA	NA	0	0	1	0	0	1	1	NA	2	1	1	1	NA	2	1	0	0	0	1	0	1	0	0	NA	1	1	0	0	1	1	0	0	0	1	0	1
Positive	No	1	23415	23415	23415	23415	23145	0	2	0	2	2	1	NA	NA	NA	NA	NA	NA	NA	NA	NA	NA	2	0	2	2	1	NA	NA	NA	NA	NA	NA	NA	NA	NA	NA	NA	NA	NA	NA	NA	NA	NA	NA	NA	NA	4
Negative	No	0	53241	12435	52341	15432	34521	1	NA	NA	NA	NA	NA	1	1	1	0	1	0	0	3	2	2	0	0	3	2	2	0	0	0	0	0	0	0	0	1	0	1	1	1	1	0	0	1	0	0	1	5
Positive	Yes	1	14253	53241	35124	41253	21345	0	1	3	3	1	0	NA	NA	NA	NA	NA	NA	NA	NA	NA	NA	1	3	3	1	0	NA	NA	NA	NA	NA	NA	NA	NA	NA	NA	NA	NA	NA	NA	NA	NA	NA	NA	NA	NA	1
Positive	Yes	0	14325	52341	13425	53124	42153	1	NA	NA	NA	NA	NA	1	1	0	0	0	0	1	1	2	1	0	1	1	2	1	0	0	0	0	0	0	0	1	1	0	0	0	1	1	0	0	0	1	0	0	1
Positive	No	1	21534	21453	23145	31254	12435	0	1	1	1	2	0	NA	NA	NA	NA	NA	NA	NA	NA	NA	NA	1	1	1	2	0	NA	NA	NA	NA	NA	NA	NA	NA	NA	NA	NA	NA	NA	NA	NA	NA	NA	NA	NA	NA	2
Negative	No	0	12345	23451	21345	12345	12345	1	NA	NA	NA	NA	NA	1	1	1	0	0	0	2	1	2	1	0	2	1	2	1	0	0	0	0	0	1	0	1	1	0	0	0	1	1	0	0	0	1	0	0	1
Positive	Yes	1	21345	23415	12345	23415	12345	0	1	0	1	1	1	NA	NA	NA	NA	NA	NA	NA	NA	NA	NA	1	0	1	1	1	NA	NA	NA	NA	NA	NA	NA	NA	NA	NA	NA	NA	NA	NA	NA	NA	NA	NA	NA	NA	2
Positive	No	0	23145	23145	21345	21345	21345	1	NA	NA	NA	NA	NA	1	0	0	0	0	0	1	2	2	1	0	1	2	2	1	0	0	0	0	0	1	0	0	1	0	1	0	1	1	0	0	0	0	1	0	3
Positive	Yes	1	21345	23415	12345	23415	12345	0	3	4	2	2	3	NA	NA	NA	NA	NA	NA	NA	NA	NA	NA	3	4	2	2	3	NA	NA	NA	NA	NA	NA	NA	NA	NA	NA	NA	NA	NA	NA	NA	NA	NA	NA	NA	NA	2
Positive	No	0	21345	23451	12345	12345	23451	1	NA	NA	NA	NA	NA	1	0	1	0	0	1	3	1	2	NA	1	3	1	2	NA	1	0	0	0	0	1	1	1	1	0	0	0	1	1	0	0	0	NA	0	0	2
Positive	No	1	21345	21345	23415	23145	21345	0	0	0	1	2	3	NA	NA	NA	NA	NA	NA	NA	NA	NA	NA	0	0	1	2	3	NA	NA	NA	NA	NA	NA	NA	NA	NA	NA	NA	NA	NA	NA	NA	NA	NA	NA	NA	NA	2
Negative	No	0	23415	23415	23415	23145	23145	1	NA	NA	NA	NA	NA	0	0	1	0	0	1	1	2	2	1	1	1	2	2	1	1	0	0	0	0	0	0	1	1	0	1	0	1	0	1	0	0	0	0	1	4
Positive	No	0	23145	12345	23451	23145	23145	1	NA	NA	NA	NA	NA	1	0	1	0	0	0	1	3	2	1	0	1	3	2	1	0	0	0	0	0	0	0	1	1	0	1	1	1	1	0	0	0	0	0	1	3
Positive	Yes	0	21345	23145	21345	12345	21345	1	NA	NA	NA	NA	NA	1	0	0	0	0	1	1	2	3	1	1	1	2	3	1	0	0	1	0	0	0	0	1	1	0	1	0	1	1	1	0	0	0	1	0	2
Positive	Yes	1	23145	23451	23451	12345	23451	0	2	3	1	2	3	NA	NA	NA	NA	NA	NA	NA	NA	NA	NA	2	3	1	2	3	NA	NA	NA	NA	NA	NA	NA	NA	NA	NA	NA	NA	NA	NA	NA	NA	NA	NA	NA	NA	3
Positive	No	1	23145	21345	21345	23415	21345	0	1	2	2	3	1	NA	NA	NA	NA	NA	NA	NA	NA	NA	NA	1	2	2	3	1	NA	NA	NA	NA	NA	NA	NA	NA	NA	NA	NA	NA	NA	NA	NA	NA	NA	NA	NA	NA	3
Positive	Yes	0	21345	12345	21345	23451	23451	1	NA	NA	NA	NA	NA	1	0	0	0	0	2	1	1	2	2	2	1	1	2	2	1	0	0	1	0	0	0	1	1	0	0	0	1	1	0	0	1	0	0	1	2
Positive	No	1	23415	21345	23145	21345	23415	0	0	1	1	1	2	NA	NA	NA	NA	NA	NA	NA	NA	NA	NA	0	1	1	1	2	NA	NA	NA	NA	NA	NA	NA	NA	NA	NA	NA	NA	NA	NA	NA	NA	NA	NA	NA	NA	4
Positive	No	0	23415	21345	12345	23145	23451	1	NA	NA	NA	NA	NA	1	0	0	0	0	0	1	3	3	0	0	1	3	3	0	0	0	0	0	0	0	0	1	1	0	1	1	1	1	0	1	0	0	0	0	4
Positive	Yes	0	12345	23451	23451	21345	23145	1	NA	NA	NA	NA	NA	0	0	1	0	0	0	1	2	2	1	0	1	2	2	1	0	0	0	0	0	0	0	1	1	0	1	0	1	1	0	0	0	0	1	0	1
Negative	No	0	21345	23415	23415	23451	23145	1	NA	NA	NA	NA	NA	1	0	1	0	1	1	1	2	1	0	1	1	2	1	0	1	0	0	0	0	1	0	0	1	0	1	0	1	0	0	0	0	0	0	0	2
Positive	Yes	1	14235	31542	35142	54312	14253	0	2	3	3	4	3	NA	NA	NA	NA	NA	NA	NA	NA	NA	NA	2	3	3	4	3	NA	NA	NA	NA	NA	NA	NA	NA	NA	NA	NA	NA	NA	NA	NA	NA	NA	NA	NA	NA	1
Positive	No	0	21345	23145	21345	23415	21345	1	NA	NA	NA	NA	NA	1	0	1	0	0	0	1	2	1	2	0	1	2	1	2	0	0	0	0	0	0	0	1	1	0	1	0	1	0	0	0	0	1	1	0	2
Positive	No	1	23451	12345	23451	23451	21345	0	0	3	3	2	1	NA	NA	NA	NA	NA	NA	NA	NA	NA	NA	0	3	3	2	1	NA	NA	NA	NA	NA	NA	NA	NA	NA	NA	NA	NA	NA	NA	NA	NA	NA	NA	NA	NA	5
Positive	Yes	1	12345	23451	21345	12345	12345	0	0	1	1	3	1	NA	NA	NA	NA	NA	NA	NA	NA	NA	NA	0	1	1	3	1	NA	NA	NA	NA	NA	NA	NA	NA	NA	NA	NA	NA	NA	NA	NA	NA	NA	NA	NA	NA	1
Negative	No	1	23415	23145	23145	23145	23451	0	2	1	1	2	1	NA	NA	NA	NA	NA	NA	NA	NA	NA	NA	2	1	1	2	1	NA	NA	NA	NA	NA	NA	NA	NA	NA	NA	NA	NA	NA	NA	NA	NA	NA	NA	NA	NA	4
Positive	Yes	1	12345	23145	12345	12345	12345	0	1	3	3	2	2	NA	NA	NA	NA	NA	NA	NA	NA	NA	NA	1	3	3	2	2	NA	NA	NA	NA	NA	NA	NA	NA	NA	NA	NA	NA	NA	NA	NA	NA	NA	NA	NA	NA	1
Positive	Yes	1	23415	23145	12345	23415	12345	0	1	2	2	2	2	NA	NA	NA	NA	NA	NA	NA	NA	NA	NA	1	2	2	2	2	NA	NA	NA	NA	NA	NA	NA	NA	NA	NA	NA	NA	NA	NA	NA	NA	NA	NA	NA	NA	4
Unknown	No	0	21345	21345	23415	23415	23451	1	NA	NA	NA	NA	NA	1	1	1	0	0	0	0	1	1	0	0	0	1	1	0	0	0	0	0	0	0	0	0	1	0	0	0	1	0	0	0	0	0	0	0	2
Positive	Yes	1	35421	23514	24315	12354	45321	0	1	1	1	1	2	NA	NA	NA	NA	NA	NA	NA	NA	NA	NA	1	1	1	1	2	NA	NA	NA	NA	NA	NA	NA	NA	NA	NA	NA	NA	NA	NA	NA	NA	NA	NA	NA	NA	5
Negative	No	1	21345	23145	21345	23451	23451	0	0	0	5	3	2	NA	NA	NA	NA	NA	NA	NA	NA	NA	NA	0	0	5	3	2	NA	NA	NA	NA	NA	NA	NA	NA	NA	NA	NA	NA	NA	NA	NA	NA	NA	NA	NA	NA	2
Positive	Yes	1	23145	23145	23415	12345	23415	0	2	2	2	1	2	NA	NA	NA	NA	NA	NA	NA	NA	NA	NA	2	2	2	1	2	NA	NA	NA	NA	NA	NA	NA	NA	NA	NA	NA	NA	NA	NA	NA	NA	NA	NA	NA	NA	3
Positive	Yes	0	23145	23451	23415	21345	23415	1	NA	NA	NA	NA	NA	1	0	0	0	0	2	1	2	3	1	2	1	2	3	1	1	0	0	1	0	0	0	1	1	0	1	0	1	1	0	1	0	0	1	0	3
Positive	No	1	23145	23415	23415	12345	23145	0	2	1	2	2	1	NA	NA	NA	NA	NA	NA	NA	NA	NA	NA	2	1	2	2	1	NA	NA	NA	NA	NA	NA	NA	NA	NA	NA	NA	NA	NA	NA	NA	NA	NA	NA	NA	NA	3
Positive	Yes	0	21345	12345	23415	23451	21345	1	NA	NA	NA	NA	NA	1	1	0	0	0	0	0	2	1	0	0	0	2	1	0	0	0	0	0	0	0	0	0	1	0	0	1	1	0	0	0	0	0	0	0	2
Positive	Yes	1	23145	23451	21345	23145	12345	0	1	2	2	0	0	NA	NA	NA	NA	NA	NA	NA	NA	NA	NA	1	2	2	0	0	NA	NA	NA	NA	NA	NA	NA	NA	NA	NA	NA	NA	NA	NA	NA	NA	NA	NA	NA	NA	3
Unknown	No	1	23145	23415	21345	21345	12345	0	1	1	2	1	1	NA	NA	NA	NA	NA	NA	NA	NA	NA	NA	1	1	2	1	1	NA	NA	NA	NA	NA	NA	NA	NA	NA	NA	NA	NA	NA	NA	NA	NA	NA	NA	NA	NA	3
Positive	No	1	23451	23415	23451	12345	23451	0	1	1	1	2	1	NA	NA	NA	NA	NA	NA	NA	NA	NA	NA	1	1	1	2	1	NA	NA	NA	NA	NA	NA	NA	NA	NA	NA	NA	NA	NA	NA	NA	NA	NA	NA	NA	NA	5
Positive	Yes	0	23451	23415	21345	23451	23451	1	NA	NA	NA	NA	NA	1	0	0	0	0	0	0	1	1	2	0	0	1	1	2	0	0	0	0	0	0	0	0	1	0	0	0	1	0	0	0	0	0	1	1	5
Unknown	No	0	23451	23415	12345	21345	23451	1	NA	NA	NA	NA	NA	1	1	1	0	0	0	0	1	2	0	0	0	1	2	0	0	0	0	0	0	0	0	0	1	0	0	0	1	1	0	0	0	0	0	0	5
Unknown	No	1	13425	42135	12354	12354	12453	0	1	1	2	3	3	NA	NA	NA	NA	NA	NA	NA	NA	NA	NA	1	1	2	3	3	NA	NA	NA	NA	NA	NA	NA	NA	NA	NA	NA	NA	NA	NA	NA	NA	NA	NA	NA	NA	1
Positive	No	1	23451	23451	23145	12345	23145	0	1	3	2	2	2	NA	NA	NA	NA	NA	NA	NA	NA	NA	NA	1	3	2	2	2	NA	NA	NA	NA	NA	NA	NA	NA	NA	NA	NA	NA	NA	NA	NA	NA	NA	NA	NA	NA	5
Positive	Yes	1	52314	12435	32514	52143	43512	0	1	2	3	3	2	NA	NA	NA	NA	NA	NA	NA	NA	NA	NA	1	2	3	3	2	NA	NA	NA	NA	NA	NA	NA	NA	NA	NA	NA	NA	NA	NA	NA	NA	NA	NA	NA	NA	4
Positive	Yes	0	23415	12345	23451	12345	23451	1	NA	NA	NA	NA	NA	1	0	1	0	0	0	1	2	3	2	0	1	2	3	2	0	0	0	0	0	0	0	1	1	1	0	0	1	1	1	0	0	1	0	1	4
Negative	No	1	23145	23145	21345	21345	23145	0	1	0	2	1	1	NA	NA	NA	NA	NA	NA	NA	NA	NA	NA	1	0	2	1	1	NA	NA	NA	NA	NA	NA	NA	NA	NA	NA	NA	NA	NA	NA	NA	NA	NA	NA	NA	NA	3
Positive	No	1	21345	23415	21345	21345	21345	0	1	1	3	1	2	NA	NA	NA	NA	NA	NA	NA	NA	NA	NA	1	1	3	1	2	NA	NA	NA	NA	NA	NA	NA	NA	NA	NA	NA	NA	NA	NA	NA	NA	NA	NA	NA	NA	2
Positive	Yes	1	21345	12345	12345	23145	23145	0	0	2	1	2	1	NA	NA	NA	NA	NA	NA	NA	NA	NA	NA	0	2	1	2	1	NA	NA	NA	NA	NA	NA	NA	NA	NA	NA	NA	NA	NA	NA	NA	NA	NA	NA	NA	NA	2
Positive	No	1	23451	23415	12345	12345	12345	0	2	3	1	3	2	NA	NA	NA	NA	NA	NA	NA	NA	NA	NA	2	3	1	3	2	NA	NA	NA	NA	NA	NA	NA	NA	NA	NA	NA	NA	NA	NA	NA	NA	NA	NA	NA	NA	5
Unknown	No	0	21345	12345	23145	23451	23451	1	NA	NA	NA	NA	NA	1	1	1	0	0	1	0	1	1	1	1	0	1	1	1	0	0	0	1	0	0	0	0	1	0	0	0	1	0	0	0	0	0	0	1	2
Positive	Yes	1	23145	23415	23415	21345	12345	0	1	2	2	1	3	NA	NA	NA	NA	NA	NA	NA	NA	NA	NA	1	2	2	1	3	NA	NA	NA	NA	NA	NA	NA	NA	NA	NA	NA	NA	NA	NA	NA	NA	NA	NA	NA	NA	3
Positive	No	0	23145	21345	23145	23415	12345	1	NA	NA	NA	NA	NA	1	0	0	1	0	0	0	1	1	0	0	0	1	1	0	0	0	0	0	0	0	0	0	1	0	0	0	1	0	0	0	0	0	0	0	3
Positive	No	1	12345	23415	21345	23415	21345	0	1	2	3	2	2	NA	NA	NA	NA	NA	NA	NA	NA	NA	NA	1	2	3	2	2	NA	NA	NA	NA	NA	NA	NA	NA	NA	NA	NA	NA	NA	NA	NA	NA	NA	NA	NA	NA	1
Unknown	No	1	23415	23451	23451	21345	21345	0	2	3	3	2	1	NA	NA	NA	NA	NA	NA	NA	NA	NA	NA	2	3	3	2	1	NA	NA	NA	NA	NA	NA	NA	NA	NA	NA	NA	NA	NA	NA	NA	NA	NA	NA	NA	NA	4
Negative	No	1	23145	23145	23451	23145	23415	0	0	1	1	0	1	NA	NA	NA	NA	NA	NA	NA	NA	NA	NA	0	1	1	0	1	NA	NA	NA	NA	NA	NA	NA	NA	NA	NA	NA	NA	NA	NA	NA	NA	NA	NA	NA	NA	3
Positive	Yes	0	12345	12345	23451	23451	23145	1	NA	NA	NA	NA	NA	1	1	0	0	0	1	1	1	2	2	1	1	1	2	2	0	0	0	1	0	0	0	1	1	0	0	0	1	1	0	0	0	1	1	0	1
Positive	Yes	0	23145	23415	21345	21345	23415	1	NA	NA	NA	NA	NA	1	1	0	0	0	1	2	2	3	3	1	2	2	3	3	1	0	0	0	1	0	0	1	1	0	0	1	1	1	0	1	0	1	1	1	3
Positive	No	1	23451	23415	23451	23451	12345	0	1	4	1	2	2	NA	NA	NA	NA	NA	NA	NA	NA	NA	NA	1	4	1	2	2	NA	NA	NA	NA	NA	NA	NA	NA	NA	NA	NA	NA	NA	NA	NA	NA	NA	NA	NA	NA	5
Negative	No	0	23145	23415	23145	23415	23415	1	NA	NA	NA	NA	NA	1	1	1	0	0	1	1	2	2	0	1	1	2	2	0	1	0	0	0	0	1	0	0	1	0	1	0	1	1	0	0	0	0	0	0	3
Positive	Yes	1	12453	13245	34152	45231	34251	0	1	1	2	3	4	NA	NA	NA	NA	NA	NA	NA	NA	NA	NA	1	1	2	3	4	NA	NA	NA	NA	NA	NA	NA	NA	NA	NA	NA	NA	NA	NA	NA	NA	NA	NA	NA	NA	1
Positive	Yes	1	12345	12345	23145	23451	23145	0	0	1	3	3	4	NA	NA	NA	NA	NA	NA	NA	NA	NA	NA	0	1	3	3	4	NA	NA	NA	NA	NA	NA	NA	NA	NA	NA	NA	NA	NA	NA	NA	NA	NA	NA	NA	NA	1
Positive	Yes	1	41235	32451	42351	51423	14235	0	1	2	2	3	2	NA	NA	NA	NA	NA	NA	NA	NA	NA	NA	1	2	2	3	2	NA	NA	NA	NA	NA	NA	NA	NA	NA	NA	NA	NA	NA	NA	NA	NA	NA	NA	NA	NA	2
Unknown	No	0	32451	31245	34521	53241	52341	1	NA	NA	NA	NA	NA	1	0	1	0	0	0	1	1	2	2	0	1	1	2	2	0	0	0	0	0	0	0	1	1	0	0	0	1	1	0	0	1	0	1	0	5
Positive	No	1	23451	12345	12345	21345	21345	0	1	1	2	2	0	NA	NA	NA	NA	NA	NA	NA	NA	NA	NA	1	1	2	2	0	NA	NA	NA	NA	NA	NA	NA	NA	NA	NA	NA	NA	NA	NA	NA	NA	NA	NA	NA	NA	5
Positive	Yes	0	23145	12345	12345	23145	23451	1	NA	NA	NA	NA	NA	1	0	0	0	0	1	1	2	2	2	1	1	2	2	2	0	0	0	1	0	0	0	1	1	0	1	0	1	1	0	0	0	0	1	1	3
Positive	Yes	0	12345	23451	23451	23145	23415	1	NA	NA	NA	NA	NA	1	1	0	0	0	1	1	2	2	1	1	1	2	2	1	1	0	0	0	0	0	0	1	1	0	1	0	1	1	0	0	0	0	0	1	1
Positive	Yes	0	12345	23415	21345	21345	21345	1	NA	NA	NA	NA	NA	1	1	0	0	1	1	1	1	2	2	1	1	1	2	2	0	0	0	1	1	0	0	0	1	0	0	0	1	1	0	0	0	0	1	1	1
Positive	No	1	23145	12345	23451	23145	12345	0	0	2	2	2	1	NA	NA	NA	NA	NA	NA	NA	NA	NA	NA	0	2	2	2	1	NA	NA	NA	NA	NA	NA	NA	NA	NA	NA	NA	NA	NA	NA	NA	NA	NA	NA	NA	NA	3
Negative	No	0	21345	12345	23415	23451	21345	1	NA	NA	NA	NA	NA	1	1	1	0	0	0	2	2	2	0	0	2	2	2	0	0	0	0	0	1	1	0	0	1	0	1	0	1	1	0	0	0	0	0	0	2
Negative	No	1	23451	23415	12345	23145	23451	0	0	1	2	2	3	NA	NA	NA	NA	NA	NA	NA	NA	NA	NA	0	1	2	2	3	NA	NA	NA	NA	NA	NA	NA	NA	NA	NA	NA	NA	NA	NA	NA	NA	NA	NA	NA	NA	5
Unknown	No	1	23145	23451	23145	21345	23451	0	1	0	1	2	2	NA	NA	NA	NA	NA	NA	NA	NA	NA	NA	1	0	1	2	2	NA	NA	NA	NA	NA	NA	NA	NA	NA	NA	NA	NA	NA	NA	NA	NA	NA	NA	NA	NA	3
Positive	Yes	1	23145	23415	23145	12345	21345	0	2	5	4	3	4	NA	NA	NA	NA	NA	NA	NA	NA	NA	NA	2	5	4	3	4	NA	NA	NA	NA	NA	NA	NA	NA	NA	NA	NA	NA	NA	NA	NA	NA	NA	NA	NA	NA	3
Positive	No	0	23145	23145	23451	21345	23415	1	NA	NA	NA	NA	NA	1	1	0	0	0	1	0	1	1	1	1	0	1	1	1	0	0	0	1	0	0	0	0	0	0	1	0	1	0	0	0	0	1	0	0	3
Negative	No	0	12345	23451	23145	23451	12345	1	NA	NA	NA	NA	NA	1	1	1	0	0	0	0	1	3	3	0	0	1	3	3	0	0	0	0	0	0	0	0	1	0	0	0	1	1	1	0	0	1	1	1	1
Positive	No	0	42315	43125	14532	14352	51324	1	NA	NA	NA	NA	NA	1	1	1	0	1	0	3	1	2	2	0	3	1	2	2	0	0	0	0	0	1	1	1	1	0	0	0	1	0	0	1	0	1	1	0	4
Unknown	No	0	23451	23451	23415	23415	12345	1	NA	NA	NA	NA	NA	0	1	1	0	0	0	1	1	3	0	0	1	1	3	0	0	0	0	0	0	0	0	1	1	0	0	0	1	1	1	0	0	0	0	0	5
Positive	Yes	0	23145	23145	12345	23145	23451	1	NA	NA	NA	NA	NA	1	0	0	0	1	0	2	1	2	1	0	2	1	2	1	0	0	0	0	1	0	0	1	1	0	0	0	1	1	0	0	0	0	1	0	3
Unknown	No	0	21345	12345	23451	23451	23145	1	NA	NA	NA	NA	NA	1	1	1	0	1	1	1	0	2	2	1	1	0	2	2	0	0	0	1	0	0	0	1	0	0	0	0	1	1	0	0	1	1	0	0	2
Positive	Yes	1	21345	23145	23415	23451	23451	0	1	1	1	3	4	NA	NA	NA	NA	NA	NA	NA	NA	NA	NA	1	1	1	3	4	NA	NA	NA	NA	NA	NA	NA	NA	NA	NA	NA	NA	NA	NA	NA	NA	NA	NA	NA	NA	2
Positive	Yes	1	25341	14352	23541	15324	14253	0	0	2	2	1	2	NA	NA	NA	NA	NA	NA	NA	NA	NA	NA	0	2	2	1	2	NA	NA	NA	NA	NA	NA	NA	NA	NA	NA	NA	NA	NA	NA	NA	NA	NA	NA	NA	NA	5
Positive	Yes	1	21345	21345	21345	21345	12345	0	2	0	2	2	0	NA	NA	NA	NA	NA	NA	NA	NA	NA	NA	2	0	2	2	0	NA	NA	NA	NA	NA	NA	NA	NA	NA	NA	NA	NA	NA	NA	NA	NA	NA	NA	NA	NA	2
Positive	No	1	21345	23415	23451	23451	12345	0	1	2	3	3	0	NA	NA	NA	NA	NA	NA	NA	NA	NA	NA	1	2	3	3	0	NA	NA	NA	NA	NA	NA	NA	NA	NA	NA	NA	NA	NA	NA	NA	NA	NA	NA	NA	NA	2
Positive	No	0	25341	21534	51432	14352	14325	1	NA	NA	NA	NA	NA	0	0	0	0	0	0	1	2	2	0	0	1	2	2	0	0	0	0	0	0	0	0	1	1	0	1	0	1	1	0	0	0	0	0	0	5
Negative	No	1	21345	23415	12345	23451	21345	0	2	2	3	3	2	NA	NA	NA	NA	NA	NA	NA	NA	NA	NA	2	2	3	3	2	NA	NA	NA	NA	NA	NA	NA	NA	NA	NA	NA	NA	NA	NA	NA	NA	NA	NA	NA	NA	2
Positive	Yes	0	12345	12345	23451	23451	23415	1	NA	NA	NA	NA	NA	1	1	0	0	0	0	1	1	2	2	0	1	1	2	2	0	0	0	0	0	0	0	1	1	0	0	0	1	1	0	0	0	0	1	1	1
Positive	No	0	23451	23415	23145	12345	23451	1	NA	NA	NA	NA	NA	1	0	0	0	0	1	1	2	3	1	1	1	2	3	1	1	0	0	0	0	0	0	1	1	0	1	0	1	1	1	0	0	1	0	0	5
Positive	Yes	1	35421	45132	51324	14325	13524	0	1	0	2	3	2	NA	NA	NA	NA	NA	NA	NA	NA	NA	NA	1	0	2	3	2	NA	NA	NA	NA	NA	NA	NA	NA	NA	NA	NA	NA	NA	NA	NA	NA	NA	NA	NA	NA	5
Unknown	No	1	21345	23145	23145	23415	21345	0	1	1	3	1	1	NA	NA	NA	NA	NA	NA	NA	NA	NA	NA	1	1	3	1	1	NA	NA	NA	NA	NA	NA	NA	NA	NA	NA	NA	NA	NA	NA	NA	NA	NA	NA	NA	NA	2
Positive	Yes	0	23415	23451	21345	21345	21345	1	NA	NA	NA	NA	NA	1	1	0	0	0	0	1	2	2	0	0	1	2	2	0	0	0	0	0	0	0	0	1	1	0	1	0	1	1	0	0	0	0	0	0	4
Positive	No	1	12345	21345	21345	23415	21345	0	1	3	3	3	3	NA	NA	NA	NA	NA	NA	NA	NA	NA	NA	1	3	3	3	3	NA	NA	NA	NA	NA	NA	NA	NA	NA	NA	NA	NA	NA	NA	NA	NA	NA	NA	NA	NA	1
Positive	No	0	23415	21345	23415	23415	21345	1	NA	NA	NA	NA	NA	1	1	0	0	0	0	2	1	2	1	0	2	1	2	1	0	0	0	0	0	1	0	1	1	0	0	0	1	1	0	0	0	0	0	1	4
Positive	No	1	53421	51324	41523	25413	45312	0	0	3	1	2	0	NA	NA	NA	NA	NA	NA	NA	NA	NA	NA	0	3	1	2	0	NA	NA	NA	NA	NA	NA	NA	NA	NA	NA	NA	NA	NA	NA	NA	NA	NA	NA	NA	NA	5
Positive	No	1	25341	24135	45213	42351	43512	0	1	2	2	2	1	NA	NA	NA	NA	NA	NA	NA	NA	NA	NA	1	2	2	2	1	NA	NA	NA	NA	NA	NA	NA	NA	NA	NA	NA	NA	NA	NA	NA	NA	NA	NA	NA	NA	5
Positive	Yes	1	21453	53421	42135	34521	32415	0	1	1	3	1	0	NA	NA	NA	NA	NA	NA	NA	NA	NA	NA	1	1	3	1	0	NA	NA	NA	NA	NA	NA	NA	NA	NA	NA	NA	NA	NA	NA	NA	NA	NA	NA	NA	NA	2
Positive	No	0	23451	23145	23451	21345	21345	1	NA	NA	NA	NA	NA	1	1	1	0	0	0	1	1	3	2	0	1	1	3	2	0	0	0	0	0	0	0	1	1	0	0	0	1	1	1	0	1	0	1	0	5
Positive	No	0	23451	23145	23451	12345	23415	1	NA	NA	NA	NA	NA	1	1	0	0	0	0	2	2	2	2	0	2	2	2	2	0	0	0	0	0	1	0	1	1	0	1	0	1	1	0	0	0	1	1	0	5
Positive	Yes	1	23451	21345	21345	23451	12345	0	1	2	1	3	2	NA	NA	NA	NA	NA	NA	NA	NA	NA	NA	1	2	1	3	2	NA	NA	NA	NA	NA	NA	NA	NA	NA	NA	NA	NA	NA	NA	NA	NA	NA	NA	NA	NA	5
Unknown	No	1	21345	21345	21345	12345	12345	0	2	3	2	3	2	NA	NA	NA	NA	NA	NA	NA	NA	NA	NA	2	3	2	3	2	NA	NA	NA	NA	NA	NA	NA	NA	NA	NA	NA	NA	NA	NA	NA	NA	NA	NA	NA	NA	2
Positive	Yes	0	12345	23451	21345	23415	23415	1	NA	NA	NA	NA	NA	1	0	0	0	0	1	0	3	1	1	1	0	3	1	1	0	0	0	1	0	0	0	0	1	0	1	1	1	0	0	0	0	0	1	0	1
Unknown	No	1	23145	23451	23451	23415	23145	0	1	1	2	2	1	NA	NA	NA	NA	NA	NA	NA	NA	NA	NA	1	1	2	2	1	NA	NA	NA	NA	NA	NA	NA	NA	NA	NA	NA	NA	NA	NA	NA	NA	NA	NA	NA	NA	3
Unknown	No	0	23415	12345	23415	23145	23451	1	NA	NA	NA	NA	NA	1	0	1	0	1	0	2	1	3	1	0	2	1	3	1	0	0	0	0	0	1	0	1	1	0	0	0	1	1	1	0	0	1	0	0	4
Positive	No	1	23415	23451	23415	23451	12345	0	2	1	1	1	1	NA	NA	NA	NA	NA	NA	NA	NA	NA	NA	2	1	1	1	1	NA	NA	NA	NA	NA	NA	NA	NA	NA	NA	NA	NA	NA	NA	NA	NA	NA	NA	NA	NA	4
Positive	No	1	23145	23415	23145	23451	23451	0	1	0	1	2	3	NA	NA	NA	NA	NA	NA	NA	NA	NA	NA	1	0	1	2	3	NA	NA	NA	NA	NA	NA	NA	NA	NA	NA	NA	NA	NA	NA	NA	NA	NA	NA	NA	NA	3
Positive	No	0	23415	23145	23145	23451	23415	1	NA	NA	NA	NA	NA	0	1	0	0	0	1	3	1	3	2	1	3	1	3	2	0	0	0	1	1	1	0	1	1	0	0	0	1	1	1	0	0	1	1	0	4
Positive	Yes	0	23145	23451	21345	12345	23145	1	NA	NA	NA	NA	NA	1	0	0	0	0	0	1	1	2	1	0	1	1	2	1	0	0	0	0	0	1	0	0	1	0	0	0	1	1	0	0	0	0	1	0	3
Positive	No	1	23415	52134	13245	25413	52143	0	2	2	2	3	4	NA	NA	NA	NA	NA	NA	NA	NA	NA	NA	2	2	2	3	4	NA	NA	NA	NA	NA	NA	NA	NA	NA	NA	NA	NA	NA	NA	NA	NA	NA	NA	NA	NA	4
Positive	No	1	12345	23451	21345	23145	23415	0	1	2	3	2	2	NA	NA	NA	NA	NA	NA	NA	NA	NA	NA	1	2	3	2	2	NA	NA	NA	NA	NA	NA	NA	NA	NA	NA	NA	NA	NA	NA	NA	NA	NA	NA	NA	NA	1
Positive	No	1	23145	21345	23145	12345	21345	0	1	1	1	2	3	NA	NA	NA	NA	NA	NA	NA	NA	NA	NA	1	1	1	2	3	NA	NA	NA	NA	NA	NA	NA	NA	NA	NA	NA	NA	NA	NA	NA	NA	NA	NA	NA	NA	3
Negative	No	0	25413	14235	52314	23514	13425	1	NA	NA	NA	NA	NA	1	0	1	0	0	0	1	1	2	1	0	1	1	2	1	0	0	0	0	0	0	0	1	1	0	0	0	1	1	0	0	0	0	1	0	4
Positive	Yes	0	21345	21345	21345	12345	12345	1	NA	NA	NA	NA	NA	0	0	0	0	0	0	1	1	2	1	0	1	1	2	1	0	0	0	0	0	1	0	0	1	0	0	0	1	1	0	0	0	1	0	0	2
Unknown	No	0	34125	54132	51342	41352	24135	1	NA	NA	NA	NA	NA	1	1	NA	0	1	1	0	2	2	1	1	0	2	2	1	1	0	0	0	0	0	0	0	1	0	1	0	1	1	0	0	0	0	1	0	3
Positive	Yes	1	23145	23415	12345	23451	12345	0	1	3	1	3	2	NA	NA	NA	NA	NA	NA	NA	NA	NA	NA	1	3	1	3	2	NA	NA	NA	NA	NA	NA	NA	NA	NA	NA	NA	NA	NA	NA	NA	NA	NA	NA	NA	NA	3
Negative	No	1	23415	23451	23415	23451	23451	0	1	2	2	2	1	NA	NA	NA	NA	NA	NA	NA	NA	NA	NA	1	2	2	2	1	NA	NA	NA	NA	NA	NA	NA	NA	NA	NA	NA	NA	NA	NA	NA	NA	NA	NA	NA	NA	4
Positive	No	1	21345	12345	23451	21345	12345	0	1	2	3	3	1	NA	NA	NA	NA	NA	NA	NA	NA	NA	NA	1	2	3	3	1	NA	NA	NA	NA	NA	NA	NA	NA	NA	NA	NA	NA	NA	NA	NA	NA	NA	NA	NA	NA	2
Positive	No	1	42315	41253	32451	24351	42135	0	2	1	2	2	0	NA	NA	NA	NA	NA	NA	NA	NA	NA	NA	2	1	2	2	0	NA	NA	NA	NA	NA	NA	NA	NA	NA	NA	NA	NA	NA	NA	NA	NA	NA	NA	NA	NA	4
Positive	No	0	21345	12345	12345	23145	12345	1	NA	NA	NA	NA	NA	1	1	1	1	0	0	1	1	2	2	0	1	1	2	2	0	0	0	0	0	0	0	1	1	0	0	0	1	1	0	0	0	0	1	1	2
Positive	Yes	1	21345	23145	12345	21345	23451	0	0	3	2	1	1	NA	NA	NA	NA	NA	NA	NA	NA	NA	NA	0	3	2	1	1	NA	NA	NA	NA	NA	NA	NA	NA	NA	NA	NA	NA	NA	NA	NA	NA	NA	NA	NA	NA	2
Negative	No	1	23145	23145	23145	21345	21345	0	1	2	3	2	3	NA	NA	NA	NA	NA	NA	NA	NA	NA	NA	1	2	3	2	3	NA	NA	NA	NA	NA	NA	NA	NA	NA	NA	NA	NA	NA	NA	NA	NA	NA	NA	NA	NA	3
Unknown	No	0	12345	23451	12345	21345	21345	1	NA	NA	NA	NA	NA	1	1	1	0	0	0	1	2	2	0	0	1	2	2	0	0	0	0	0	0	0	0	1	1	0	1	0	1	1	0	0	0	0	0	0	1
Positive	Yes	1	23415	12345	12345	23145	23415	0	1	2	2	2	2	NA	NA	NA	NA	NA	NA	NA	NA	NA	NA	1	2	2	2	2	NA	NA	NA	NA	NA	NA	NA	NA	NA	NA	NA	NA	NA	NA	NA	NA	NA	NA	NA	NA	4
Unknown	No	0	21345	23451	23145	21345	12345	1	NA	NA	NA	NA	NA	0	0	1	0	0	1	1	1	2	1	1	1	1	2	1	0	0	0	1	0	0	0	1	1	0	0	0	1	0	1	0	0	1	0	0	2
Positive	Yes	0	12345	23145	21345	21345	23415	1	NA	NA	NA	NA	NA	1	0	0	0	0	0	1	2	2	1	0	1	2	2	1	0	0	0	0	0	0	0	1	1	0	1	0	1	1	0	0	0	0	1	0	1
Negative	No	1	21345	23451	12345	23415	23451	0	1	3	1	2	2	NA	NA	NA	NA	NA	NA	NA	NA	NA	NA	1	3	1	2	2	NA	NA	NA	NA	NA	NA	NA	NA	NA	NA	NA	NA	NA	NA	NA	NA	NA	NA	NA	NA	2
Unknown	No	1	12345	23415	23415	12345	23415	0	1	1	3	1	1	NA	NA	NA	NA	NA	NA	NA	NA	NA	NA	1	1	3	1	1	NA	NA	NA	NA	NA	NA	NA	NA	NA	NA	NA	NA	NA	NA	NA	NA	NA	NA	NA	NA	1
Negative	No	0	21345	23415	23451	23145	23145	1	NA	NA	NA	NA	NA	1	1	1	0	0	0	2	3	2	3	0	2	3	2	3	0	0	0	0	0	1	0	1	1	1	1	0	1	1	0	0	0	1	1	1	2
Unknown	No	1	31452	51324	25134	34521	43152	0	1	2	2	3	1	NA	NA	NA	NA	NA	NA	NA	NA	NA	NA	1	2	2	3	1	NA	NA	NA	NA	NA	NA	NA	NA	NA	NA	NA	NA	NA	NA	NA	NA	NA	NA	NA	NA	2
Negative	No	1	12345	21345	23415	21345	23415	0	1	1	2	2	3	NA	NA	NA	NA	NA	NA	NA	NA	NA	NA	1	1	2	2	3	NA	NA	NA	NA	NA	NA	NA	NA	NA	NA	NA	NA	NA	NA	NA	NA	NA	NA	NA	NA	1
Negative	No	0	21345	23415	12345	23145	23145	1	NA	NA	NA	NA	NA	1	1	1	0	0	0	0	1	2	1	0	0	1	2	1	0	0	0	0	0	0	0	0	1	0	0	0	1	0	0	1	0	1	0	0	2
Unknown	No	0	23145	23145	23451	21345	23415	1	NA	NA	NA	NA	NA	1	1	1	0	0	1	2	2	2	1	1	2	2	2	1	0	0	0	1	0	1	0	1	1	0	1	0	1	1	0	0	0	0	1	0	3
Unknown	No	1	23154	32145	23415	31452	31245	0	1	2	NA	2	4	NA	NA	NA	NA	NA	NA	NA	NA	NA	NA	1	2	NA	2	4	NA	NA	NA	NA	NA	NA	NA	NA	NA	NA	NA	NA	NA	NA	NA	NA	NA	NA	NA	NA	3
Negative	No	0	14235	31452	45123	43125	32154	1	NA	NA	NA	NA	NA	1	1	1	0	0	1	1	1	2	2	1	1	1	2	2	0	0	0	1	0	0	0	1	1	0	0	0	1	1	0	0	0	1	1	0	1
Unknown	No	1	21345	12345	23451	23145	23451	0	0	1	1	2	2	NA	NA	NA	NA	NA	NA	NA	NA	NA	NA	0	1	1	2	2	NA	NA	NA	NA	NA	NA	NA	NA	NA	NA	NA	NA	NA	NA	NA	NA	NA	NA	NA	NA	2
Unknown	No	1	23415	12345	23451	12345	21345	0	0	2	2	1	0	NA	NA	NA	NA	NA	NA	NA	NA	NA	NA	0	2	2	1	0	NA	NA	NA	NA	NA	NA	NA	NA	NA	NA	NA	NA	NA	NA	NA	NA	NA	NA	NA	NA	4
Unknown	No	0	23415	23145	23145	12345	12345	1	NA	NA	NA	NA	NA	0	0	1	0	0	1	1	0	2	2	1	1	0	2	2	0	0	0	1	0	1	0	0	0	0	0	0	1	1	0	0	0	0	1	1	4
Unknown	No	0	23145	21345	23415	23145	23145	1	NA	NA	NA	NA	NA	1	1	1	0	1	0	1	1	2	2	0	1	1	2	2	0	0	0	0	0	0	0	1	0	0	1	0	1	1	0	0	0	0	1	1	3
Unknown	No	0	21345	23415	23145	21345	23145	1	NA	NA	NA	NA	NA	1	1	0	0	0	1	2	2	2	1	1	2	2	2	1	0	0	0	1	1	1	0	0	1	0	1	0	1	1	0	0	0	0	1	0	2
[truncated: 20 more columns]
